# Supplementary material for: A regenerative dual-functional platform combining dendritic silica and anthraquinone amide: advancing seawater lithium detection and recovery with biosensing capabilities
Source: Royal Society of Chemistry journal article supplement (doi:10.1039/d4ta05025h), 2024-01-01
Supplement: d4ta05025h1.pdf [file d4ta05025h1.pdf]

## Supporting Information

### **A Regenerative Dual-Functional Platform Combining Dendritic Silica and Anthraquinone Amide: Advancing Seawater Lithium Detection and Recovery with Biosensing Capabilities†**

Nishu Choudhary,<sup>ac</sup> Sanjay Yadav,<sup>ac</sup> Tulsi R. Patel,<sup>bc</sup> Padmaja D. Wakchaure,<sup>bc</sup> Vasavdutta Sonpal,<sup>bc</sup> Bishwajit Ganguly,<sup>\*bc</sup> Alok Ranjan Paital<sup>\*ac</sup>

| S. No. | Content                                                                                                                                                                                                                                                                                | Page No |
|--------|----------------------------------------------------------------------------------------------------------------------------------------------------------------------------------------------------------------------------------------------------------------------------------------|---------|
| 1      | Materials, Instrumentation, and Experimental (Batch adsorption studies, Photophysical studies, and biosensing-fluorescence imaging studies, Toxicity studies & Adsorption studies from sea bittern)                                                                                    | S2-S5   |
| 4      | <sup>1</sup> H, <sup>13</sup> C NMR and LC-MS of 2,2'-((9,10-dioxo-9,10-dihydroanthracene-1,8-diyl) bis(oxy)diacetate) and DAAH (Fig. S1-S6)                                                                                                                                           | S5-S8   |
| 5      | The structure formation illustration & Pore size distribution of synthesized materials (Fig. S7 & S8)                                                                                                                                                                                  | S9      |
| 6      | Full scan XPS of the material MDNS@DAAH, O 1s and Si-2p XPS spectra of the intermediate material MDNS@Cl and final material MDNS@DAAH (Fig. S9 – S11)                                                                                                                                  | S10-11  |
| 7      | Fluorescence interference, response behaviour studies, Linear range, and Scatchard plot (Fig. S12- S13)                                                                                                                                                                                | S11-S12 |
| 8      | Computational methodology (Table S1- S2)                                                                                                                                                                                                                                               | S12-S41 |
| 9      | Freundlich adsorption plot, Langmuir and Freundlich adsorption parameters and the competitive adsorption results from ICP-MS analysis, Adsorption profile, Rate kinetics, Gibbs energy plot (Fig. S14-S17, Table S3 – S4)                                                              | S41-S44 |
| 10     | Zeta potential measurement, Optical response, FTIR, and SEM morphology comparison MDNS@DAAH (Fig. S18- S19)                                                                                                                                                                            | S44-45  |
| 11     | Comparison of sensing and adsorption parameters (Table S5)                                                                                                                                                                                                                             | S45-46  |
| 12     | Fluorescence emission of material with seawater and spiked samples, the calibration plot, Mortality % of Artemia Salina, Quantification of Li <sup>+</sup> ions probe materials in seawater sample & PXRD Profile recovered Li <sub>2</sub> CO <sub>3</sub> (Fig. S20-21, Table S6-S7) | S46-47  |
| 13     | References                                                                                                                                                                                                                                                                             | S48     |

**Materials:**

All the chemicals and reagents utilized in chemical processing and synthetic procedures were of analytical grade. Dry solvents were employed in the chemical synthesis without additional purification steps. TMOS (Tetramethylorthosilicate), hydrazine hydrate, 1,8-dihydroxyanthraquinone, ethylbromoacetate, HEPES buffer, (3-Chloropropyl)triethoxysilane (3-CPTES), urea, potassium carbonate, and BDAC (Benzyl dimethyl dodecyl ammonium chloride) were purchased from Merck (Sigma-Aldrich) & TCI chemical private Ltd. Milli Q water, HCl, NaOH, methanol, chloroform, dimethyl formamide, and chloride salts of all cations and potassium salts of anions were procured from Spectrochem Pvt. Ltd.

**Instrumentation:** The following instruments were utilized for various analyses: The Shimadzu UV 3101PC spectrophotometer and Edinburgh Instruments model Xe-900 captured absorption and fluorescence emission spectra in an aqueous dispersion medium using a 380 nm excitation source. Structural characterization involved obtaining FT-IR spectra using a PerkinElmer GX spectrophotometer with KBr pellets. Surface area measurements were carried out using the Micromeritics 3 FLEX instrument after activating the sample at 55 °C for 1 hour. For surface morphology analysis scanning electron microscopy (SEM-Leo series 1420 VP) equipped with INCA and transmission electron microscopy (TEM) using an electron microscope JEOL-JEM 2100 was used. Lacey carbon-coated grids were used for both techniques. X-ray photoelectron spectroscopy Thermo Fisher Nexsa spectrophotometer with monochromated Al K $\alpha$  radiation at 1486.6 eV was used to analyse the surface and the chemical state. The metal ions concentration was determined using an ICP-MS Thermo Fisher iCAP Qnova series instrument;

samples were preferentially filtered through Thermo Fisher syringe filters (0.24  $\mu\text{m}$ ). Thermal stability was investigated by TGA analysis using a Mettler-Toledo (TGA/SDTA 851E) instrument in the presence of air, with a heating rate of 10  $^{\circ}\text{C}/\text{min}$ . A Rigaku MiniFlex-II (FD 41521) powder diffractometer from Japan was used to record Powder X-ray diffraction profiles at a scan rate of 1 $^{\circ}$  per minute. Fluorescence lifetime measurements were conducted using TSPC experiments on an Edinburgh Instruments OB 920 fluorescence spectrophotometer equipped with a pulse diode laser (Laser-EPLED-380 nm) as the excitation source.

**Batch adsorption studies:** The lithium extraction potential of the material was evaluated by batch adsorption studies. Typically, 5 mg of the material was treated in LiCl aqueous solution of varying concentrations (5 to 100 ppm) and shaken until equilibrium was achieved (2 h). Following the treatment, the filtrates in the sample tubes underwent centrifugation, followed by filtration through a Thermo Fisher syringe filter. The concentration of lithium was then determined using ICP-MS. The equation  $Q_e = (C_i - C_e) V/W$  can be used to find the equilibrium adsorption capacity ( $Q_e$ ) in this case.  $C_i$  and  $C_e$  represent the initial and final concentrations of  $\text{Li}^+$  ions,  $V$  stands for volume in liters, and  $W$  is the mass of the adsorbent in grams. The Langmuir model can be expressed in the usual linear equation form of  $C_e/q_e = 1/K_L q_m + C_e/q_m$  to describe the adsorption isotherm. Here,  $q_e$  represents the equilibrium adsorption;  $q_m$  is the maximum adsorption capacity in  $\text{mg L}^{-1}$ ; and  $C_e$  is the equilibrium metal ion concentration reached prior to any adsorption, while  $K_L$  is the Langmuir adsorption constant in  $\text{L mg}^{-1}$ . For Freundlich adsorption isotherm model, the model described by the equation:  $\ln q_e = \ln K_F + 1/n \ln C_e$ , was employed whereby  $K_F$  ( $\text{L g}^{-1}$ ),  $n$  are Freundlich constants.

**Photophysical studies:** For UV–Visible and fluorescence investigations, a 2 mL suspension of MDNS@DAAH material (0.2 mg per 2 mL, suspended in an aqueous medium) was mixed with various analyte aqueous buffer solutions individually and vigorously shaken using a

vortex shaker for 1 minute. This agitation process was repeated after each spectrophotometric/fluorescence reading. UV–Vis spectra were recorded within the range of 200 to 800 nm, while fluorescence spectra were recorded within the range of 400–680 nm with an excitation wavelength of 390 nm. To determine the limit of detection (LOD), solutions containing analytes in concentrations ranging from 0 to 130  $\mu\text{M}$  were incrementally added to the MDNS@DAAH suspension (0.2 mg per 2 mL), and fluorescent intensity was monitored. The slope (S) of the graph showing fluorescence intensity against increasing analyte concentration was calculated. The standard deviation (SD) was obtained from three blank measurements. The LOD and LOQ were computed using the  $3\sigma$  and  $10\sigma$  formulas, respectively.

***Biosensing-Fluorescence Imaging Studies:*** A batch of *A. salina* cysts was taken from the freezer and left to hatch overnight in a vigorously aerated vessel exposed to intense visible light. The following day, the hatched cysts developed into *Artemia* larvae (nauplii), which were then used for the biosensing experiments. Approximately 30 *Artemia* nauplii were placed in 10 mL of seawater, to which 100  $\mu\text{L}$  of the suspended MDNS@DAAH aqueous solution (prepared from a 10 mg/10 mL stock solution) was added and allowed to incubate for 2 hours and fluorescence imaging were carried out. The treated *Artemia* nauplii were subsequently exposed to a 10 mL brine solution containing 100  $\mu\text{L}$  of 100  $\mu\text{M}$  of  $\text{Li}^+$  ions. Following this, some organisms from the tube were transferred onto a glass slide and examined under a BX53 OLYMPUS microscope equipped with both bright and fluorescent filters.

***Toxicity Studies:*** Mature *Artemia* nauplii (approximately 30 individuals  $\pm$  3) that had hatched were randomly chosen using a sterile glass dropper and transferred into test tubes containing 10 mL of sterile seawater. In one set of experiments, 100  $\mu\text{L}$  of material suspension (prepared

at 10 mg/10 mL) was added to the test tubes and placed under light at room temperature, with the number of live *Artemia* recorded after 6, 12, and 24 hours. Similar experiments were conducted separately, with 100  $\mu\text{L}$  of metal ions only (at  $100 \times 10^{-6} \text{ M Li}^+$ ) in 10 mL of sterile seawater, and in the presence of both material and metal ions. All experiments were conducted in triplicate using  $30 \pm 3$  *Artemia* under identical conditions, and the percentage of mortality was calculated considering the standard deviations using the formula: mortality percentage = (observed mortality – control mortality)/(total number of *Artemia* – control mortality)  $\times 100$ . (Table S6†)

### **Lithium extraction studies from sea bittern.**

The lithium adsorption experiment from sea bittern was scaled up, using 4 L of sea bittern with a density of 33.13 °Bé (Specific Gravity 1.296). The bittern was filtered and treated with 0.5 g of the material in a 5-liter flask, then stirred overnight (~12 h). The resulting suspension was centrifuged in batches, and the lithium-adsorbed material was recovered. The material was then washed three times with Milli-Q water before lithium stripping. It was then treated with 10 mL of 0.5 N HCl, stirred for 1 hour, centrifuged, and washed with Milli-Q water. The aqueous part was collected in a conical flask and heated on a hot plate to reduce the volume to 5 mL. A saturated  $\text{Na}_2\text{CO}_3$  solution (~ 1.5 g in 5 mL) was added to the heated solution near boiling, resulting in the precipitation of  $\text{Li}_2\text{CO}_3$ , which was then hot filtered. The obtained  $\text{Li}_2\text{CO}_3$  (~ 80 mg) was dried and characterized using powder XRD, with a purity of ~ 98% assessed through ICP-MS analysis.

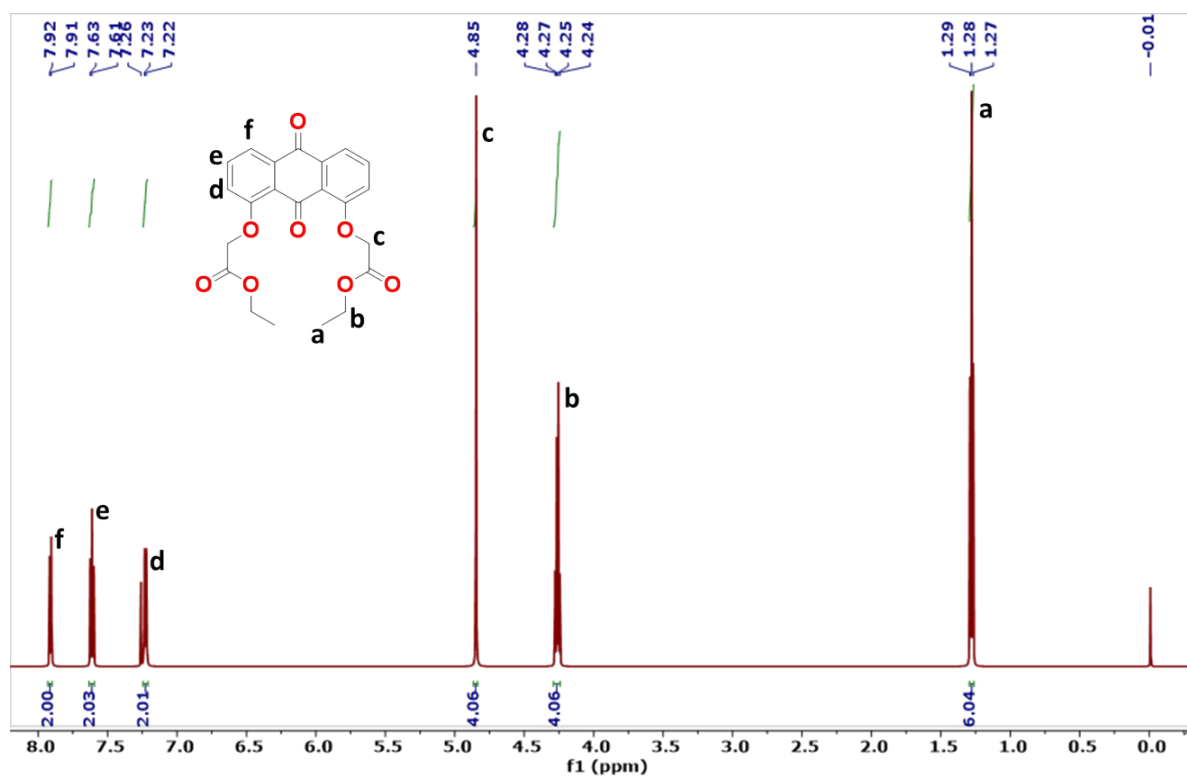

**Fig. S1** <sup>1</sup>H NMR of 2,2'-((9,10-dioxo-9,10-dihydroanthracene-1,8-diyl)bis(oxy)diacetate) at 600 MHz in CDCl<sub>3</sub> solvent.

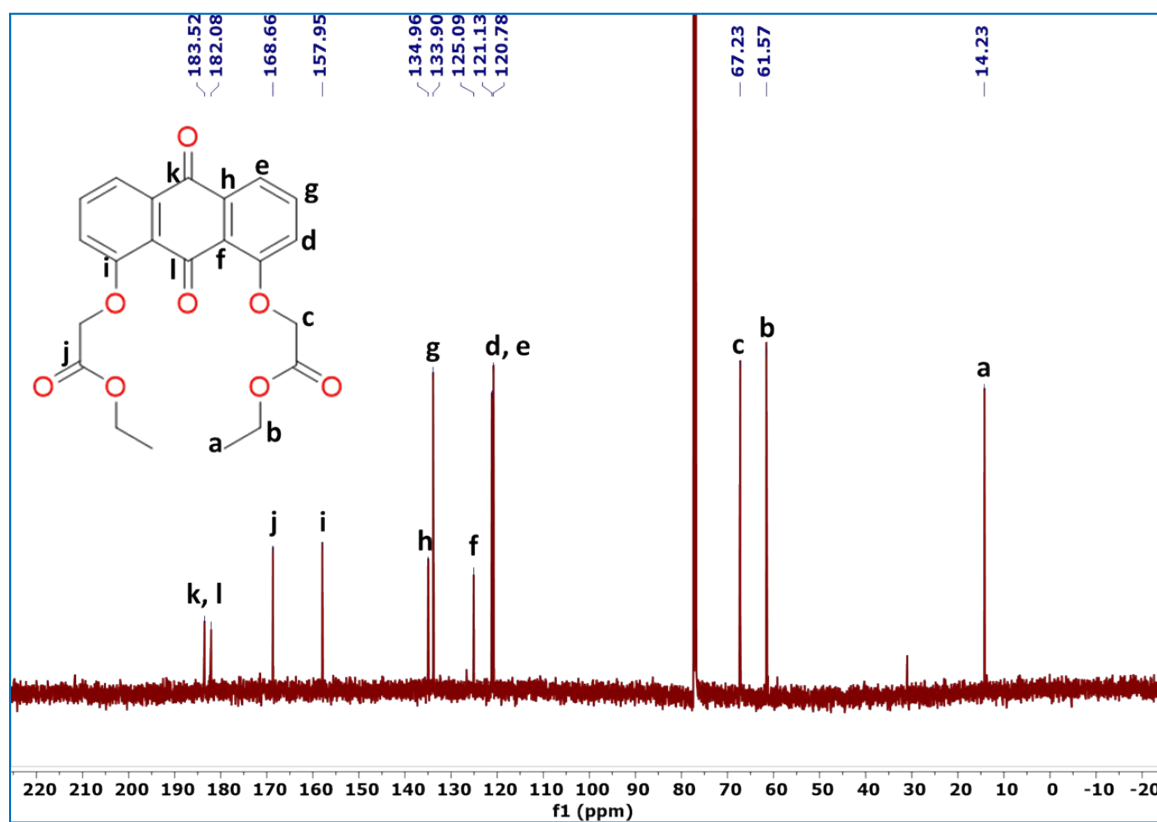

**Fig. S2** <sup>13</sup>C NMR of 2,2'-((9,10-dioxo-9,10-dihydroanthracene-1,8-diyl)bis(oxy)diacetate) at 600 MHz in CDCl<sub>3</sub> solvent.

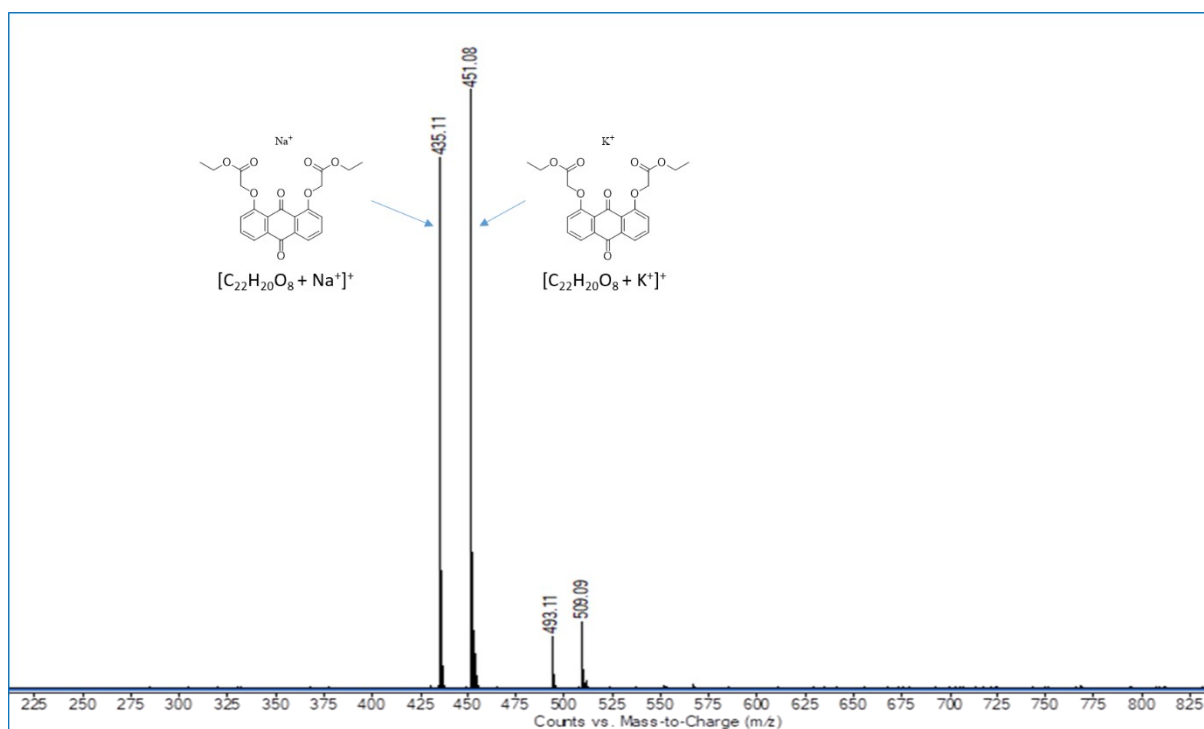

**Fig. S3** LC-MS of 2,2'-(9,10-dioxo-9,10-dihydroanthracene-1,8-diyl)bis(oxy)diacetate).

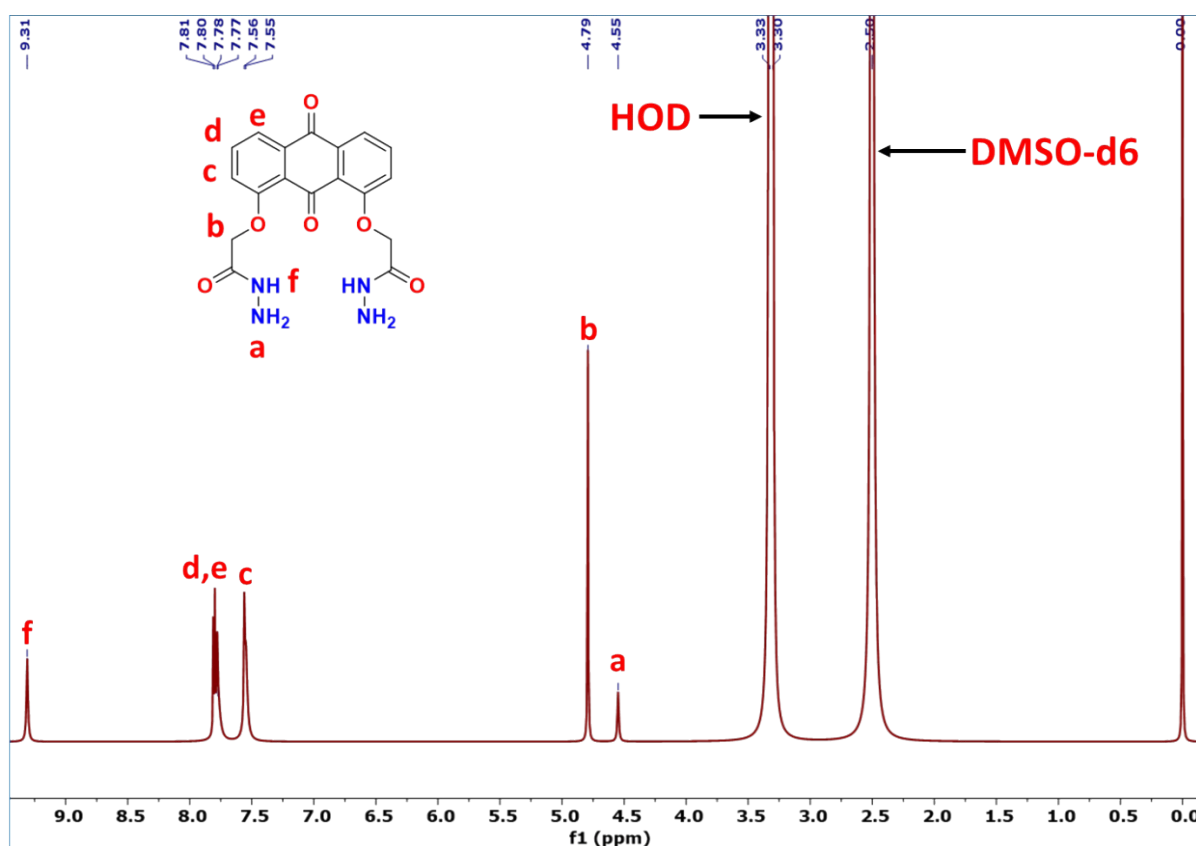

**Fig. S4**  $^1\text{H}$  NMR of DAAH at 600 MHz in  $\text{DMSO-d}_6$  solvent.

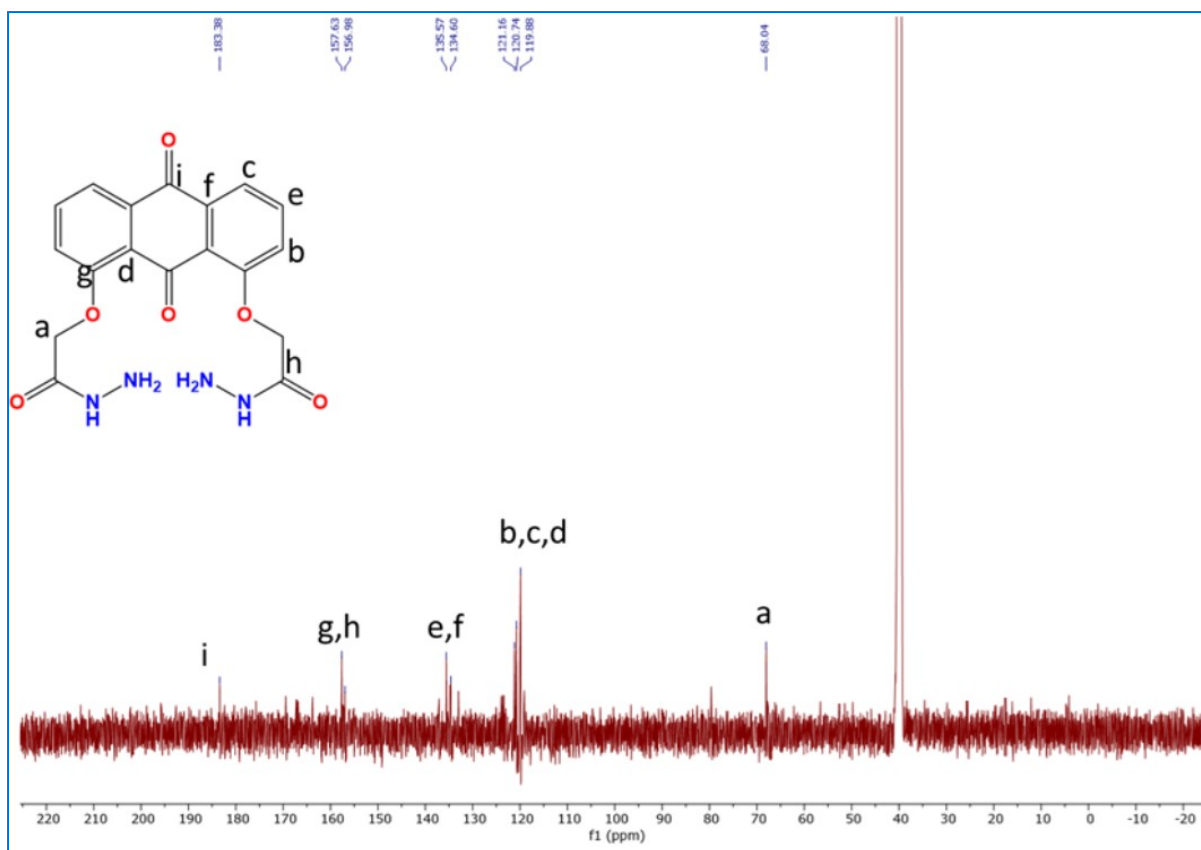

Fig. S5  $^{13}\text{C}$  NMR of DAAH at 600 MHz in DMSO- $d_6$  Solvent.

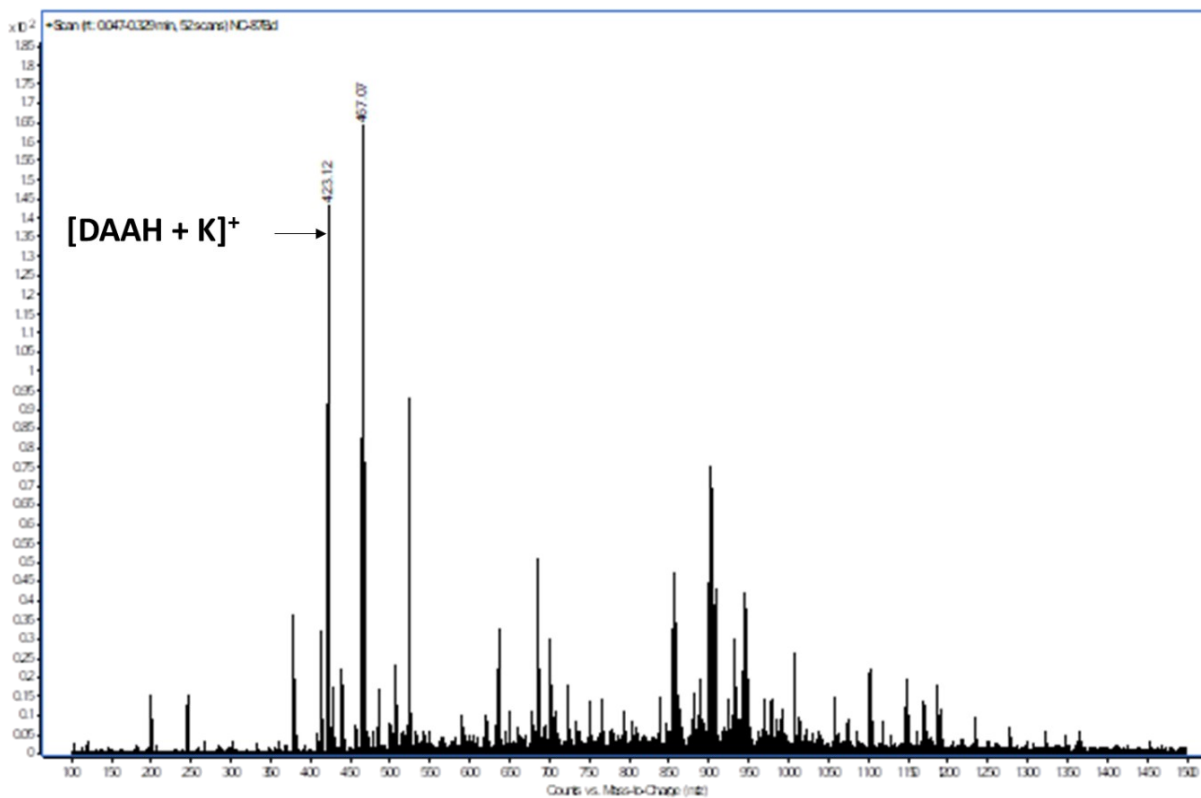

Fig. S6 LC-MS spectrum of DAAH.



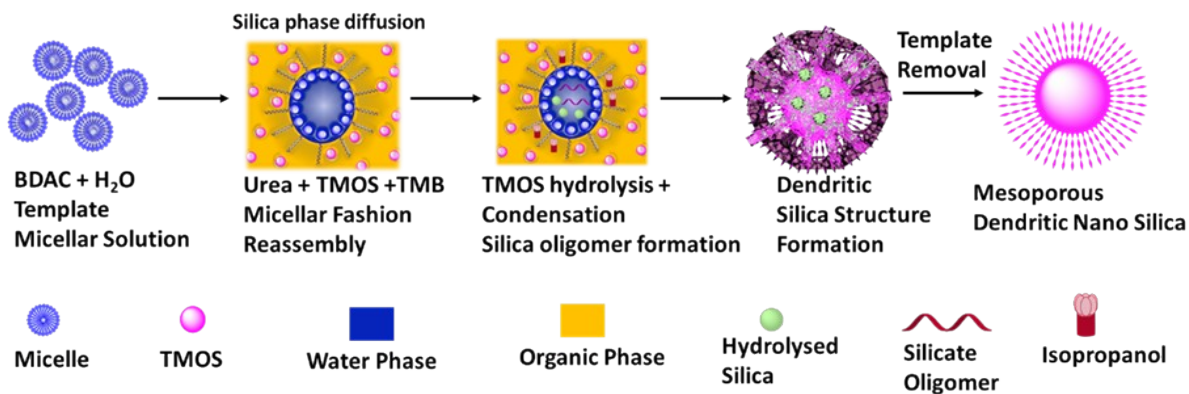

**Fig. S7** The schematic representation of the proposed formation of mesoporous dendritic nano-silica.

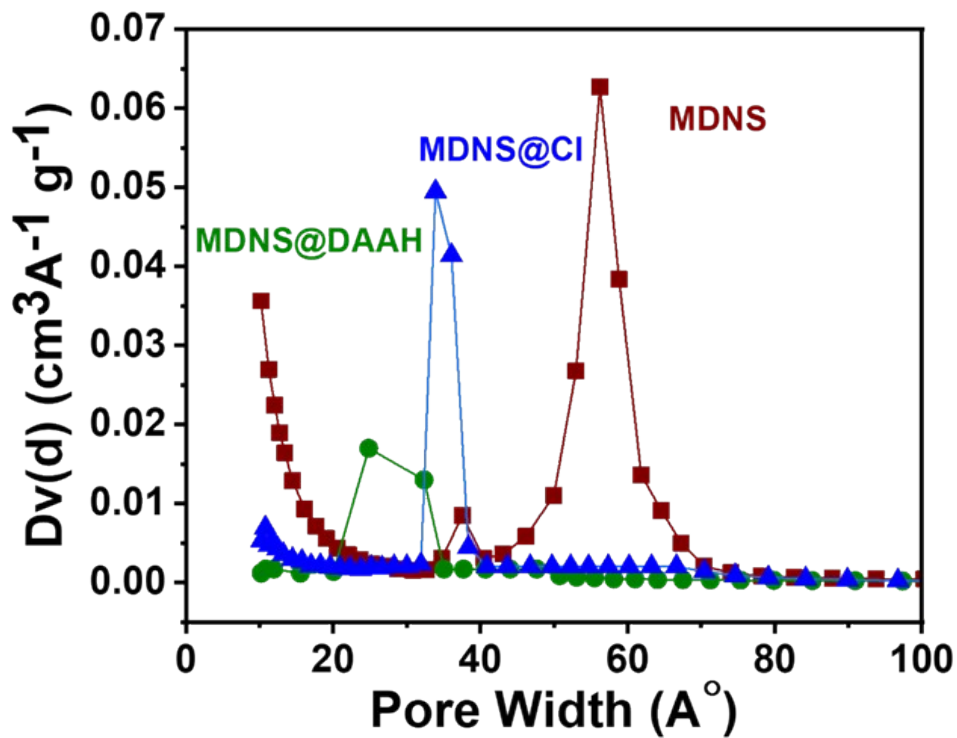

**Fig. S8** The pore size distribution of the synthesized materials.

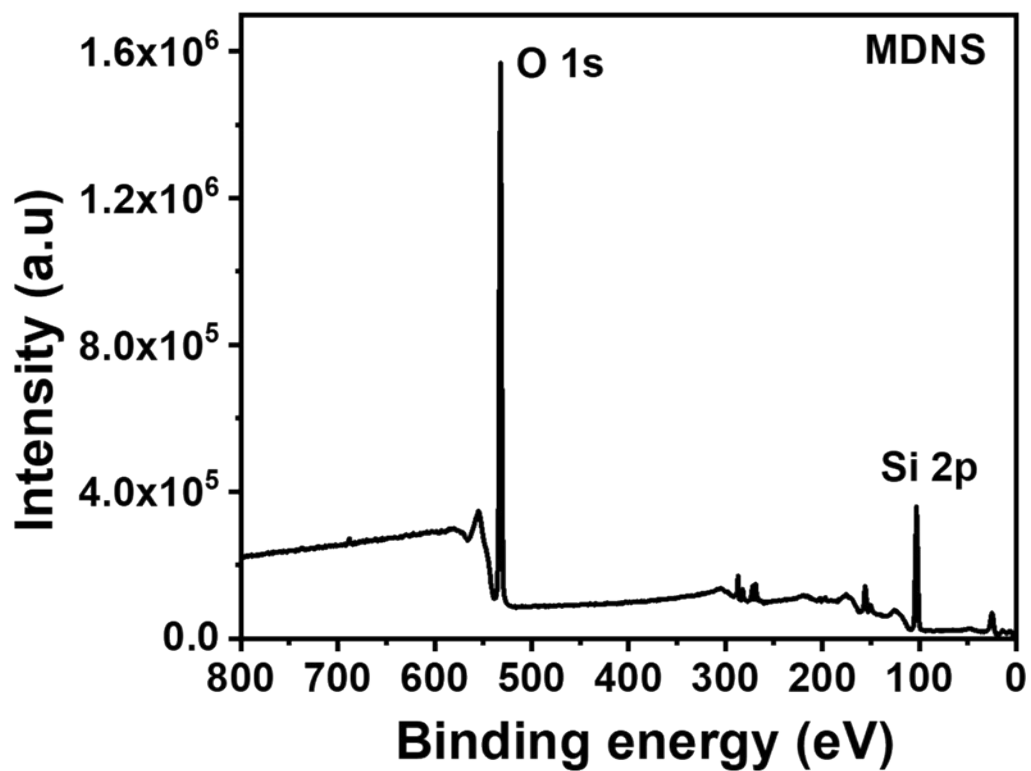

Fig. S9 The Full scan XPS spectra of the synthesized mesoporous dendritic Nano silica (MDNS).

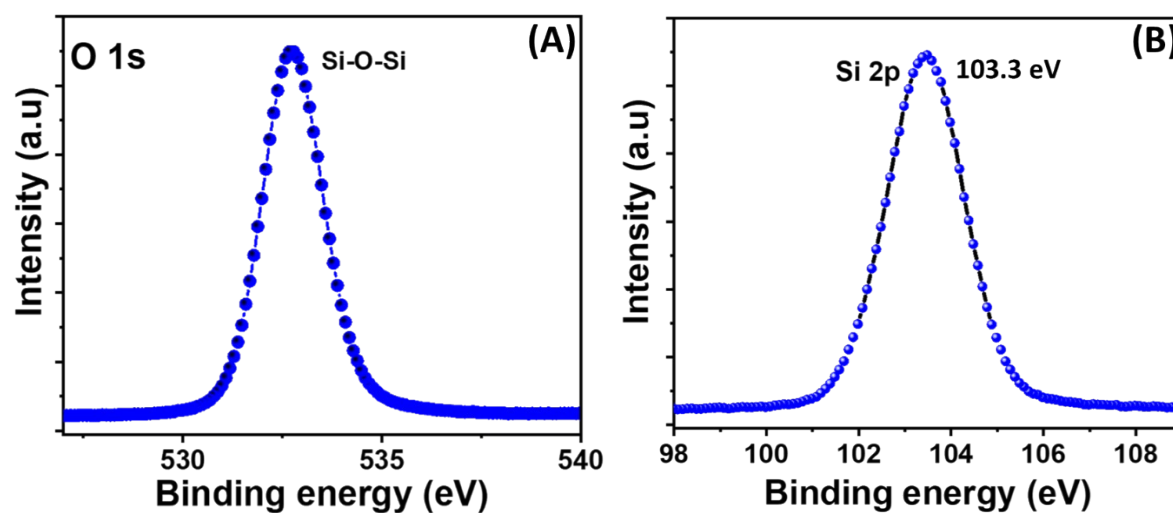

Fig. S10 (A, B) The O 1s and Si-2p XPS spectra of the intermediate material MDNS@Cl.

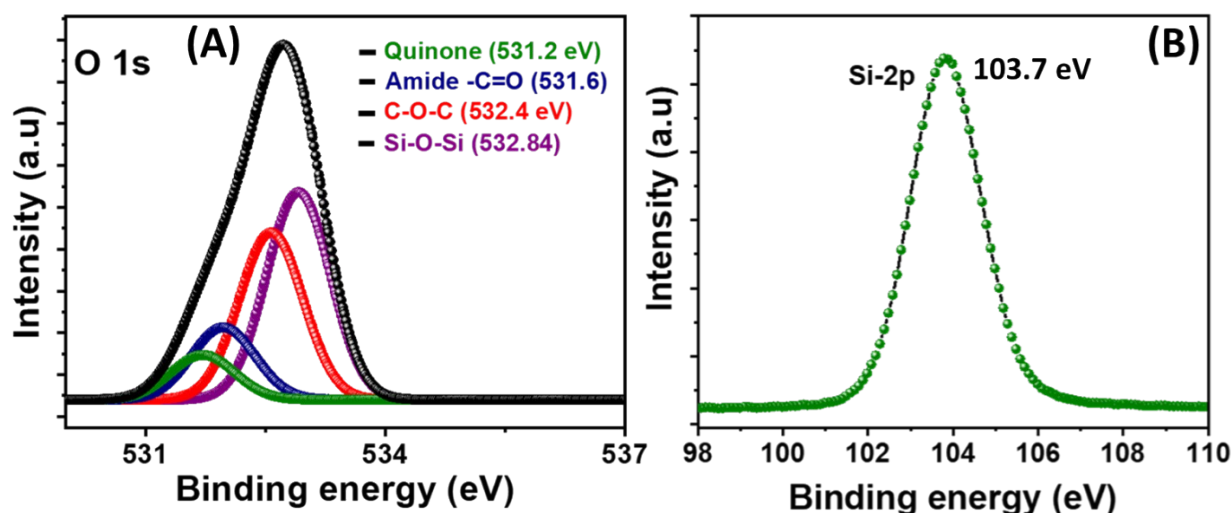

Fig. S11 (A, B) The O 1s and Si-2p XPS spectra of the final material MDNS@DAAH.

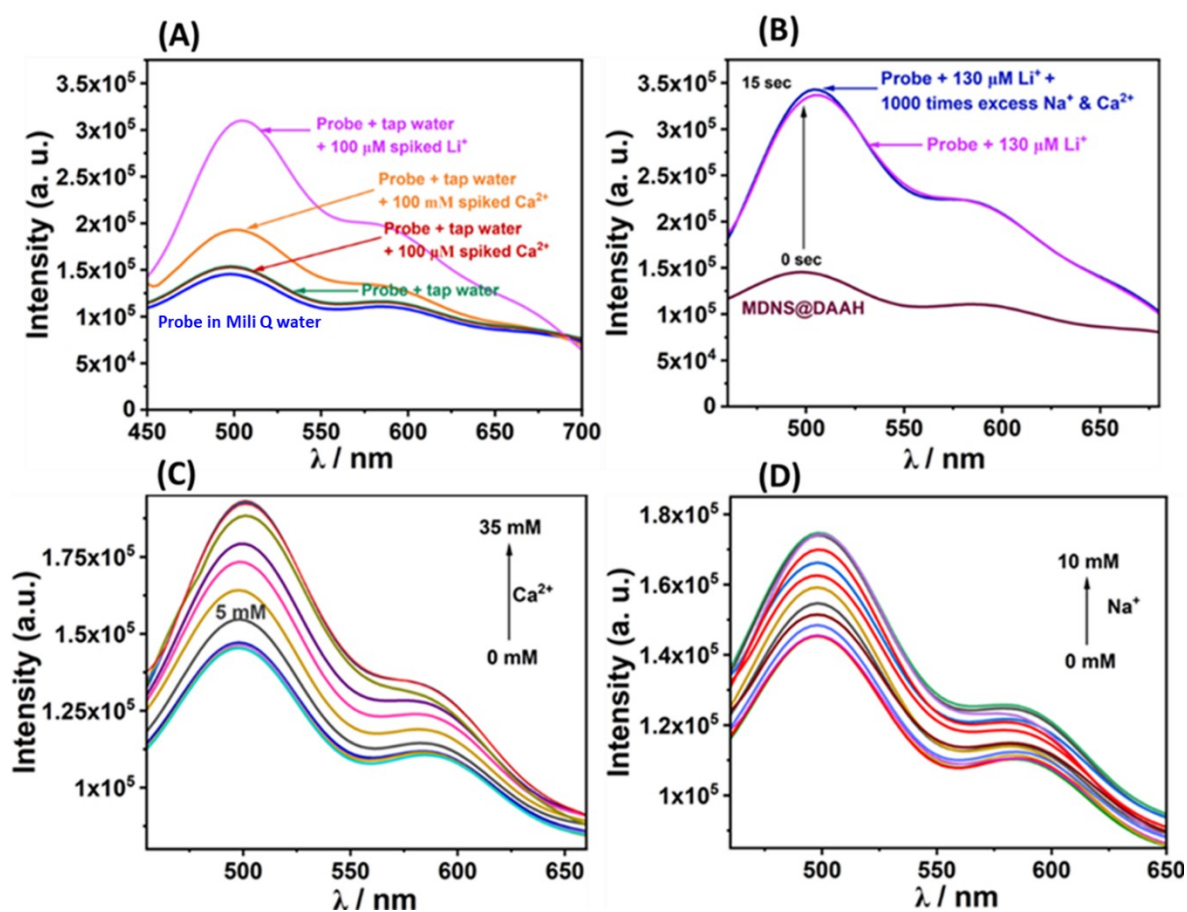

Fig. S12 (A, B) The Fluorescence interference and response behaviour of the material towards  $\text{Li}^+$  ions in tap water and pure aqueous solution. (C, D) The fluorescence titration with the  $\text{Ca}^{2+}$  and  $\text{Na}^+$  ions at saturation concentration.

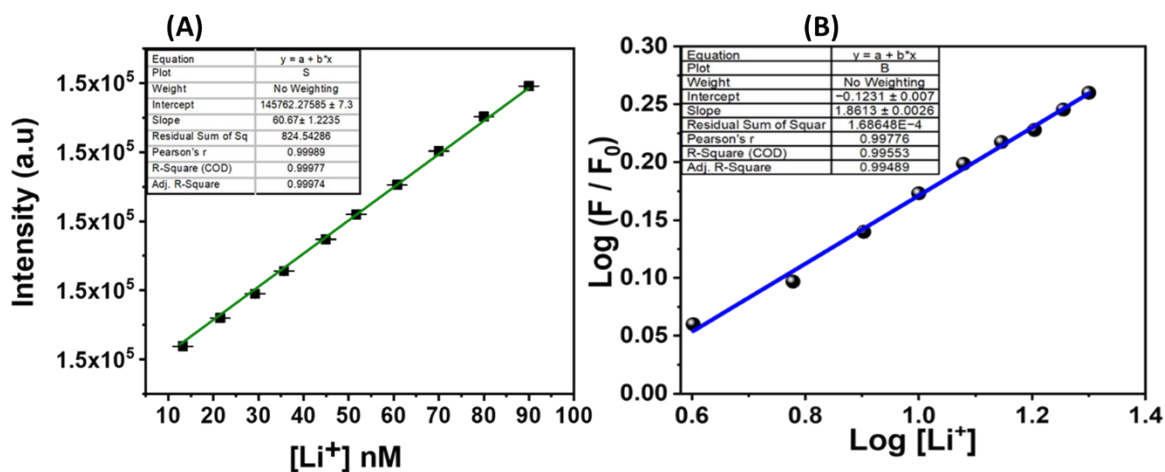

**Fig. S13** The Linear range plot (A) and the Scatchard plot (B) of the material towards  $\text{Li}^+$  ions.

### Computational methodology:

The conformational search was performed using the *Spartan'08* software to get the lowest energy conformation.<sup>1</sup> The resulting geometries were optimized at B3LYP functional<sup>2</sup> with Grimme's third-generation dispersion<sup>3</sup> and using Ahlrich's double zeta basis set with a polarization function Def2-SVP.<sup>4</sup> All geometry optimization calculations were performed with the Gaussian09 program.<sup>5</sup> The geometries were optimized in the presence of the Truhlar and co-workers' SMD solvation model with water as solvent.<sup>6</sup> Harmonic vibration frequency calculations were performed for all geometries to confirm the minima on their potential energy surface. The average binding energy and Gibbs free energy of the  $\text{LiH}_2\text{O}$  and  $\text{LiCl}$  binding were calculated with the following equation,

$$\Delta E \text{ or } \Delta G = \frac{E \text{ or } G_{\text{complex}} - (E \text{ or } G_{\text{comp}} + nE \text{ or } G_{\text{Li} + \text{H}_2\text{O}/\text{Cl}})}{n}$$

Where in binding energy calculations  $E_{\text{complex}}$  is the electronic energy of the complex, the  $E_{\text{comp}}$  is the electronic energy of the individual compound, the  $E_{\text{Li}+\text{H}_2\text{O}/\text{Cl}}$  is the sum of the electronic energy of the  $\text{Li}^+$  ion and  $\text{H}_2\text{O}$  or  $\text{Cl}^-$  and  $n$  is number of  $\text{Li}^+$  ion,  $\text{H}_2\text{O}$  or  $\text{Cl}^-$  bound to the complex.

In the case of binding Gibbs free energy calculations,  $G_{\text{complex}}$  is the free energy of the complex,  $G_{\text{comp}}$  is the free energy of the individual compound, the  $G_{\text{Li}+\text{H}_2\text{O}/\text{Cl}}$  is the sum of the electronic

energy of the  $\text{Li}^+$  ion and  $\text{H}_2\text{O}$  or  $\text{Cl}^-$  and  $n$  is number of  $\text{Li}^+$  ion,  $\text{H}_2\text{O}$  or  $\text{Cl}^-$  bound to the complex.

The frontier molecular orbitals (FMOs) were examined for the optimized geometries at a similar level of theory. The HOMO-LUMO band gaps were calculated using the following equation,

$$\Delta E = E_{LUMO} - E_{HOMO}$$

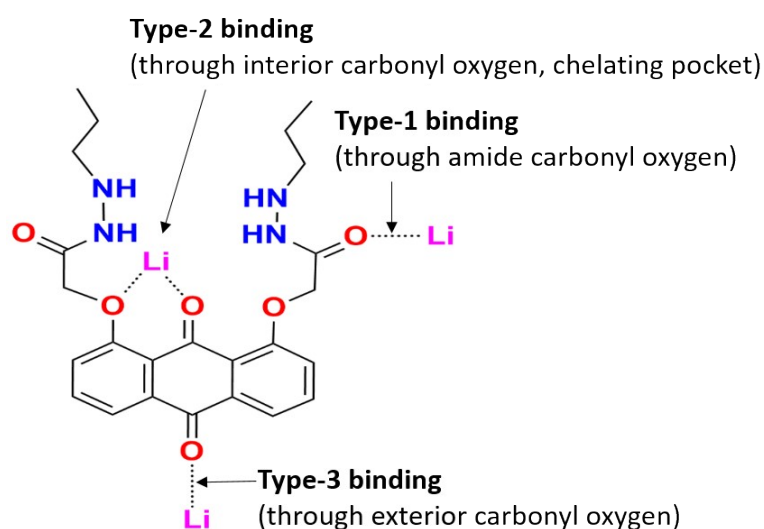

**Table S1.** The average binding energies ( $\Delta E$ ) and Gibbs free energies ( $\Delta G$ ) in kcal/mol for various probable lithium complexes.

| Entries | Complexes                                                                                                 | $\Delta E$ | $\Delta G$ |
|---------|-----------------------------------------------------------------------------------------------------------|------------|------------|
| 1       | DAAH@1Li@1Cl-Type1<br>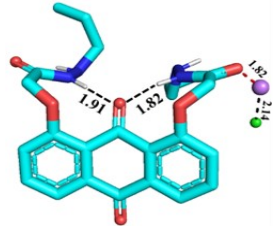 | -26.0      | -14.2      |
| 2       | DAAH@1Li@1Cl-Type2                                                                                        | -34.5      | -21.0      |

|   |                                                                                                            |       |       |
|---|------------------------------------------------------------------------------------------------------------|-------|-------|
|   | 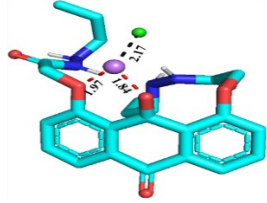                          |       |       |
| 3 | DAAH@1Li@1Cl-Type3<br>    | -18.1 | -9.2  |
| 4 | DAAH@1Li@1H2O-Type1<br>   | -49.3 | -30.3 |
| 5 | DAAH@1Li@1H2O-Type2<br> | -56.5 | -33.5 |
| 6 | DAAH@1Li@1H2O-Type3<br> | -41.8 | -23.4 |
| 7 | DAAH@2Li@2Cl-Type1<br>  | -24.7 | -14.1 |
| 8 | DAAH@2Li@2Cl-Type2<br>  | -34.0 | -20.9 |
| 9 | DAAH@2Li@2H2O-Type-1                                                                                       | -47.8 | -27.6 |

|    |                                                                                     |       |       |
|----|-------------------------------------------------------------------------------------|-------|-------|
|    | 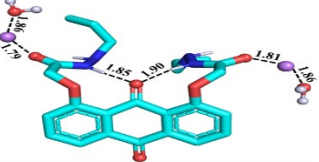   |       |       |
| 10 | DAAH@2Li@2H <sub>2</sub> O-Type-2                                                   | -53.9 | -30.5 |
|    |    |       |       |
| 11 | DAAH@2Li@2Cl@2H <sub>2</sub> O-Type2-<br>mode1<br>[syn(arms)-syn(LiCl)]             | -49.0 | -25.9 |
|    |   |       |       |
| 12 | DAAH@2Li@2Cl@2H <sub>2</sub> O-Type2-<br>mode2<br>[syn(arms)-anti(LiCl)]            | -55.4 | -30.8 |
|    |  |       |       |
| 13 | DAAH@2Li@2Cl@2H <sub>2</sub> O-Type2-<br>mode3<br>[anti(arms)-anti(LiCl)]           | -57.0 | -32.1 |
|    |  |       |       |
| 14 | DAAH@2Li@4H <sub>2</sub> O-Type2-mode1<br>(syn)                                     | -75.2 | -40.8 |





|             |             |             |             |
|-------------|-------------|-------------|-------------|
| C           | 0.70874300  | -4.32746000 | -0.14982200 |
| C           | 0.40659000  | -3.04675300 | -0.63795800 |
| H           | -5.91275000 | 1.02038400  | 0.54317700  |
| H           | -5.08951800 | -1.04241400 | 1.70887500  |
| H           | -4.55686400 | 2.06416900  | -1.23280400 |
| H           | 0.14922600  | -5.92097400 | 1.18375400  |
| H           | 1.57625300  | -4.86284200 | -0.53516600 |
| O           | -0.11491500 | -0.18665600 | -0.88628200 |
| O           | -3.45186300 | -2.82304700 | 2.21317500  |
| O           | 1.13573500  | -2.46327400 | -1.63103900 |
| O           | -2.17582000 | 1.15406500  | -2.08013400 |
| C           | 2.54825600  | -2.63480600 | -1.66895300 |
| H           | 2.87127200  | -2.24212200 | -2.64446200 |
| H           | 2.85998200  | -3.68801500 | -1.61319700 |
| C           | -2.18817000 | 2.54464000  | -2.38440800 |
| C           | 3.28804500  | -1.86302000 | -0.57853800 |
| C           | -1.35569300 | 3.36825700  | -1.40982200 |
| C           | 3.54440400  | 1.27043100  | 0.59011600  |
| H           | 2.65309900  | 1.79276700  | 0.21101500  |
| H           | 3.85150100  | 1.80123100  | 1.50620500  |
| C           | 4.66893300  | 1.33191500  | -0.44756900 |
| H           | 4.76251300  | 2.38243800  | -0.77410000 |
| H           | 4.36796200  | 0.76121800  | -1.34419900 |
| C           | 6.01806800  | 0.83024700  | 0.06588100  |
| H           | 6.34222300  | 1.40043000  | 0.95321300  |
| H           | 5.96858400  | -0.23382300 | 0.34425200  |
| H           | 6.80217700  | 0.93153500  | -0.70199300 |
| C           | 0.22357100  | 2.95167200  | 1.50341500  |
| H           | -0.83931800 | 3.13923500  | 1.75862700  |
| H           | 0.39195500  | 1.86654700  | 1.59702400  |
| C           | 1.13450500  | 3.69997000  | 2.47121800  |
| H           | 2.18545600  | 3.46371700  | 2.23271500  |
| H           | 0.94537000  | 3.29609900  | 3.48001100  |
| C           | 0.92868300  | 5.21592500  | 2.48272100  |
| H           | 1.20233900  | 5.67842400  | 1.51970200  |
| H           | -0.12354600 | 5.47331000  | 2.69155400  |
| H           | 1.55107200  | 5.69280900  | 3.25671400  |
| O           | 4.43673300  | -2.19490200 | -0.25692100 |
| O           | -1.53431900 | 4.58888100  | -1.29773200 |
| N           | 2.61207300  | -0.84280700 | -0.03180700 |
| N           | 3.11492000  | -0.06899400 | 1.02666000  |
| N           | -0.38971700 | 2.69129000  | -0.77291100 |
| N           | 0.50232800  | 3.32079600  | 0.10600400  |
| H           | -0.26221100 | 1.68189200  | -0.90826800 |
| H           | 0.34970400  | 4.32378400  | -0.02135000 |
| H           | 1.65937800  | -0.61815400 | -0.33731800 |
| H           | 3.90893800  | -0.58688500 | 1.40816700  |
| H           | -3.19778800 | 2.97637700  | -2.42742500 |
| H           | -1.74465900 | 2.63646600  | -3.38705800 |
| <b>LiCl</b> |             |             |             |

|                                                                                                                                                                                                                                                                                                                                                                                                                                                                                                                                                                                                                                                                                                                                                                                                                                                                                                                                                                                                                                                                                                                                                                                                                                                                                                                                                                                                                                                                                                                                                                                                                                                                                                                                                                                                                                                                                                                                                                                           |             |             |             |             |                                                                                     |             |             |             |                                                                                     |             |             |             |                                                                                     |             |             |             |   |             |             |             |   |             |             |             |   |            |             |            |   |            |             |             |   |            |             |             |   |            |             |            |   |            |             |            |   |            |             |            |   |            |             |            |   |            |             |             |   |            |             |             |   |             |             |            |   |             |             |            |   |             |             |             |   |            |             |            |   |            |             |             |   |            |             |             |   |            |             |            |                                                                                       |
|-------------------------------------------------------------------------------------------------------------------------------------------------------------------------------------------------------------------------------------------------------------------------------------------------------------------------------------------------------------------------------------------------------------------------------------------------------------------------------------------------------------------------------------------------------------------------------------------------------------------------------------------------------------------------------------------------------------------------------------------------------------------------------------------------------------------------------------------------------------------------------------------------------------------------------------------------------------------------------------------------------------------------------------------------------------------------------------------------------------------------------------------------------------------------------------------------------------------------------------------------------------------------------------------------------------------------------------------------------------------------------------------------------------------------------------------------------------------------------------------------------------------------------------------------------------------------------------------------------------------------------------------------------------------------------------------------------------------------------------------------------------------------------------------------------------------------------------------------------------------------------------------------------------------------------------------------------------------------------------------|-------------|-------------|-------------|-------------|-------------------------------------------------------------------------------------|-------------|-------------|-------------|-------------------------------------------------------------------------------------|-------------|-------------|-------------|-------------------------------------------------------------------------------------|-------------|-------------|-------------|---|-------------|-------------|-------------|---|-------------|-------------|-------------|---|------------|-------------|------------|---|------------|-------------|-------------|---|------------|-------------|-------------|---|------------|-------------|------------|---|------------|-------------|------------|---|------------|-------------|------------|---|------------|-------------|------------|---|------------|-------------|-------------|---|------------|-------------|-------------|---|-------------|-------------|------------|---|-------------|-------------|------------|---|-------------|-------------|-------------|---|------------|-------------|------------|---|------------|-------------|-------------|---|------------|-------------|-------------|---|------------|-------------|------------|---------------------------------------------------------------------------------------|
| <p>Electronic Energy (EE) = -467.693901 Hartree<br/> EE + Thermal Free Energy Correction = -467.713434 Hartree</p> <table border="0"> <tr> <td>Li</td> <td>0.00000000</td> <td>0.00000000</td> <td>-1.78143200</td> </tr> <tr> <td>Cl</td> <td>0.00000000</td> <td>0.00000000</td> <td>0.31437000</td> </tr> </table>                                                                                                                                                                                                                                                                                                                                                                                                                                                                                                                                                                                                                                                                                                                                                                                                                                                                                                                                                                                                                                                                                                                                                                                                                                                                                                                                                                                                                                                                                                                                                                                                                                                                     | Li          | 0.00000000  | 0.00000000  | -1.78143200 | Cl                                                                                  | 0.00000000  | 0.00000000  | 0.31437000  | 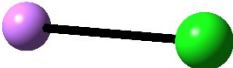 |             |             |             |                                                                                     |             |             |             |   |             |             |             |   |             |             |             |   |            |             |            |   |            |             |             |   |            |             |             |   |            |             |            |   |            |             |            |   |            |             |            |   |            |             |            |   |            |             |             |   |            |             |             |   |             |             |            |   |             |             |            |   |             |             |             |   |            |             |            |   |            |             |             |   |            |             |             |   |            |             |            |                                                                                       |
| Li                                                                                                                                                                                                                                                                                                                                                                                                                                                                                                                                                                                                                                                                                                                                                                                                                                                                                                                                                                                                                                                                                                                                                                                                                                                                                                                                                                                                                                                                                                                                                                                                                                                                                                                                                                                                                                                                                                                                                                                        | 0.00000000  | 0.00000000  | -1.78143200 |             |                                                                                     |             |             |             |                                                                                     |             |             |             |                                                                                     |             |             |             |   |             |             |             |   |             |             |             |   |            |             |            |   |            |             |             |   |            |             |             |   |            |             |            |   |            |             |            |   |            |             |            |   |            |             |            |   |            |             |             |   |            |             |             |   |             |             |            |   |             |             |            |   |             |             |             |   |            |             |            |   |            |             |             |   |            |             |             |   |            |             |            |                                                                                       |
| Cl                                                                                                                                                                                                                                                                                                                                                                                                                                                                                                                                                                                                                                                                                                                                                                                                                                                                                                                                                                                                                                                                                                                                                                                                                                                                                                                                                                                                                                                                                                                                                                                                                                                                                                                                                                                                                                                                                                                                                                                        | 0.00000000  | 0.00000000  | 0.31437000  |             |                                                                                     |             |             |             |                                                                                     |             |             |             |                                                                                     |             |             |             |   |             |             |             |   |             |             |             |   |            |             |            |   |            |             |             |   |            |             |             |   |            |             |            |   |            |             |            |   |            |             |            |   |            |             |            |   |            |             |             |   |            |             |             |   |             |             |            |   |             |             |            |   |             |             |             |   |            |             |            |   |            |             |             |   |            |             |             |   |            |             |            |                                                                                       |
| <p><b>Li<sup>+</sup></b></p> <p>Electronic Energy (EE) = -7.424990 Hartree<br/> EE + Thermal Free Energy Correction = -7.437738 Hartree</p> <table border="0"> <tr> <td>Li</td> <td>0.00000000</td> <td>0.00000000</td> <td>0.00000000</td> </tr> </table>                                                                                                                                                                                                                                                                                                                                                                                                                                                                                                                                                                                                                                                                                                                                                                                                                                                                                                                                                                                                                                                                                                                                                                                                                                                                                                                                                                                                                                                                                                                                                                                                                                                                                                                                | Li          | 0.00000000  | 0.00000000  | 0.00000000  |  |             |             |             |                                                                                     |             |             |             |                                                                                     |             |             |             |   |             |             |             |   |             |             |             |   |            |             |            |   |            |             |             |   |            |             |             |   |            |             |            |   |            |             |            |   |            |             |            |   |            |             |            |   |            |             |             |   |            |             |             |   |             |             |            |   |             |             |            |   |             |             |             |   |            |             |            |   |            |             |             |   |            |             |             |   |            |             |            |                                                                                       |
| Li                                                                                                                                                                                                                                                                                                                                                                                                                                                                                                                                                                                                                                                                                                                                                                                                                                                                                                                                                                                                                                                                                                                                                                                                                                                                                                                                                                                                                                                                                                                                                                                                                                                                                                                                                                                                                                                                                                                                                                                        | 0.00000000  | 0.00000000  | 0.00000000  |             |                                                                                     |             |             |             |                                                                                     |             |             |             |                                                                                     |             |             |             |   |             |             |             |   |             |             |             |   |            |             |            |   |            |             |             |   |            |             |             |   |            |             |            |   |            |             |            |   |            |             |            |   |            |             |            |   |            |             |             |   |            |             |             |   |             |             |            |   |             |             |            |   |             |             |             |   |            |             |            |   |            |             |             |   |            |             |             |   |            |             |            |                                                                                       |
| <p><b>H2O</b></p> <p>Electronic Energy (EE) = -76.369891 Hartree<br/> EE + Thermal Free Energy Correction = -76.366570 Hartree</p> <table border="0"> <tr> <td>O</td> <td>0.00000000</td> <td>0.00000000</td> <td>0.12156400</td> </tr> <tr> <td>H</td> <td>0.00000000</td> <td>0.75465500</td> <td>-0.48625700</td> </tr> <tr> <td>H</td> <td>0.00000000</td> <td>-0.75465500</td> <td>-0.48625700</td> </tr> </table>                                                                                                                                                                                                                                                                                                                                                                                                                                                                                                                                                                                                                                                                                                                                                                                                                                                                                                                                                                                                                                                                                                                                                                                                                                                                                                                                                                                                                                                                                                                                                                   | O           | 0.00000000  | 0.00000000  | 0.12156400  | H                                                                                   | 0.00000000  | 0.75465500  | -0.48625700 | H                                                                                   | 0.00000000  | -0.75465500 | -0.48625700 |  |             |             |             |   |             |             |             |   |             |             |             |   |            |             |            |   |            |             |             |   |            |             |             |   |            |             |            |   |            |             |            |   |            |             |            |   |            |             |            |   |            |             |             |   |            |             |             |   |             |             |            |   |             |             |            |   |             |             |             |   |            |             |            |   |            |             |             |   |            |             |             |   |            |             |            |                                                                                       |
| O                                                                                                                                                                                                                                                                                                                                                                                                                                                                                                                                                                                                                                                                                                                                                                                                                                                                                                                                                                                                                                                                                                                                                                                                                                                                                                                                                                                                                                                                                                                                                                                                                                                                                                                                                                                                                                                                                                                                                                                         | 0.00000000  | 0.00000000  | 0.12156400  |             |                                                                                     |             |             |             |                                                                                     |             |             |             |                                                                                     |             |             |             |   |             |             |             |   |             |             |             |   |            |             |            |   |            |             |             |   |            |             |             |   |            |             |            |   |            |             |            |   |            |             |            |   |            |             |            |   |            |             |             |   |            |             |             |   |             |             |            |   |             |             |            |   |             |             |             |   |            |             |            |   |            |             |             |   |            |             |             |   |            |             |            |                                                                                       |
| H                                                                                                                                                                                                                                                                                                                                                                                                                                                                                                                                                                                                                                                                                                                                                                                                                                                                                                                                                                                                                                                                                                                                                                                                                                                                                                                                                                                                                                                                                                                                                                                                                                                                                                                                                                                                                                                                                                                                                                                         | 0.00000000  | 0.75465500  | -0.48625700 |             |                                                                                     |             |             |             |                                                                                     |             |             |             |                                                                                     |             |             |             |   |             |             |             |   |             |             |             |   |            |             |            |   |            |             |             |   |            |             |             |   |            |             |            |   |            |             |            |   |            |             |            |   |            |             |            |   |            |             |             |   |            |             |             |   |             |             |            |   |             |             |            |   |             |             |             |   |            |             |            |   |            |             |             |   |            |             |             |   |            |             |            |                                                                                       |
| H                                                                                                                                                                                                                                                                                                                                                                                                                                                                                                                                                                                                                                                                                                                                                                                                                                                                                                                                                                                                                                                                                                                                                                                                                                                                                                                                                                                                                                                                                                                                                                                                                                                                                                                                                                                                                                                                                                                                                                                         | 0.00000000  | -0.75465500 | -0.48625700 |             |                                                                                     |             |             |             |                                                                                     |             |             |             |                                                                                     |             |             |             |   |             |             |             |   |             |             |             |   |            |             |            |   |            |             |             |   |            |             |             |   |            |             |            |   |            |             |            |   |            |             |            |   |            |             |            |   |            |             |             |   |            |             |             |   |             |             |            |   |             |             |            |   |             |             |             |   |            |             |            |   |            |             |             |   |            |             |             |   |            |             |            |                                                                                       |
| <p><b>DAAH@1Li@1H2O-Type1</b></p> <p>Electronic Energy (EE) = -1684.550358 Hartree<br/> EE + Thermal Free Energy Correction = -1684.088585 Hartree</p> <table border="0"> <tr><td>C</td><td>-2.30855300</td><td>-4.37040200</td><td>0.20077800</td></tr> <tr><td>C</td><td>-1.11402700</td><td>-4.39804900</td><td>0.92144100</td></tr> <tr><td>C</td><td>-0.11032200</td><td>-3.47087600</td><td>0.63103800</td></tr> <tr><td>C</td><td>-0.30591900</td><td>-2.47578400</td><td>-0.35724900</td></tr> <tr><td>C</td><td>-1.50901000</td><td>-2.48587400</td><td>-1.10247500</td></tr> <tr><td>C</td><td>-2.50164700</td><td>-3.43442100</td><td>-0.81381900</td></tr> <tr><td>C</td><td>1.17624400</td><td>-3.55592200</td><td>1.38040500</td></tr> <tr><td>C</td><td>0.71832900</td><td>-1.40950200</td><td>-0.51249600</td></tr> <tr><td>C</td><td>2.10596300</td><td>-1.72456500</td><td>-0.08556800</td></tr> <tr><td>C</td><td>2.31290200</td><td>-2.72211900</td><td>0.89699600</td></tr> <tr><td>C</td><td>3.58185600</td><td>-2.94025300</td><td>1.43902300</td></tr> <tr><td>H</td><td>3.70807800</td><td>-3.70072300</td><td>2.21026500</td></tr> <tr><td>C</td><td>4.66616600</td><td>-2.19057200</td><td>0.98041200</td></tr> <tr><td>C</td><td>4.49418700</td><td>-1.23401600</td><td>-0.01877800</td></tr> <tr><td>C</td><td>3.22237500</td><td>-0.99664300</td><td>-0.56256100</td></tr> <tr><td>H</td><td>-3.09377400</td><td>-5.09885500</td><td>0.41398400</td></tr> <tr><td>H</td><td>-0.94435100</td><td>-5.13910400</td><td>1.70293500</td></tr> <tr><td>H</td><td>-3.42173600</td><td>-3.45703000</td><td>-1.39720100</td></tr> <tr><td>H</td><td>5.66294400</td><td>-2.35999500</td><td>1.39345200</td></tr> <tr><td>H</td><td>5.35588000</td><td>-0.67942500</td><td>-0.38976900</td></tr> <tr><td>O</td><td>0.41695100</td><td>-0.27837800</td><td>-0.90425700</td></tr> <tr><td>O</td><td>1.30892100</td><td>-4.32208900</td><td>2.32842200</td></tr> </table> | C           | -2.30855300 | -4.37040200 | 0.20077800  | C                                                                                   | -1.11402700 | -4.39804900 | 0.92144100  | C                                                                                   | -0.11032200 | -3.47087600 | 0.63103800  | C                                                                                   | -0.30591900 | -2.47578400 | -0.35724900 | C | -1.50901000 | -2.48587400 | -1.10247500 | C | -2.50164700 | -3.43442100 | -0.81381900 | C | 1.17624400 | -3.55592200 | 1.38040500 | C | 0.71832900 | -1.40950200 | -0.51249600 | C | 2.10596300 | -1.72456500 | -0.08556800 | C | 2.31290200 | -2.72211900 | 0.89699600 | C | 3.58185600 | -2.94025300 | 1.43902300 | H | 3.70807800 | -3.70072300 | 2.21026500 | C | 4.66616600 | -2.19057200 | 0.98041200 | C | 4.49418700 | -1.23401600 | -0.01877800 | C | 3.22237500 | -0.99664300 | -0.56256100 | H | -3.09377400 | -5.09885500 | 0.41398400 | H | -0.94435100 | -5.13910400 | 1.70293500 | H | -3.42173600 | -3.45703000 | -1.39720100 | H | 5.66294400 | -2.35999500 | 1.39345200 | H | 5.35588000 | -0.67942500 | -0.38976900 | O | 0.41695100 | -0.27837800 | -0.90425700 | O | 1.30892100 | -4.32208900 | 2.32842200 |  |
| C                                                                                                                                                                                                                                                                                                                                                                                                                                                                                                                                                                                                                                                                                                                                                                                                                                                                                                                                                                                                                                                                                                                                                                                                                                                                                                                                                                                                                                                                                                                                                                                                                                                                                                                                                                                                                                                                                                                                                                                         | -2.30855300 | -4.37040200 | 0.20077800  |             |                                                                                     |             |             |             |                                                                                     |             |             |             |                                                                                     |             |             |             |   |             |             |             |   |             |             |             |   |            |             |            |   |            |             |             |   |            |             |             |   |            |             |            |   |            |             |            |   |            |             |            |   |            |             |            |   |            |             |             |   |            |             |             |   |             |             |            |   |             |             |            |   |             |             |             |   |            |             |            |   |            |             |             |   |            |             |             |   |            |             |            |                                                                                       |
| C                                                                                                                                                                                                                                                                                                                                                                                                                                                                                                                                                                                                                                                                                                                                                                                                                                                                                                                                                                                                                                                                                                                                                                                                                                                                                                                                                                                                                                                                                                                                                                                                                                                                                                                                                                                                                                                                                                                                                                                         | -1.11402700 | -4.39804900 | 0.92144100  |             |                                                                                     |             |             |             |                                                                                     |             |             |             |                                                                                     |             |             |             |   |             |             |             |   |             |             |             |   |            |             |            |   |            |             |             |   |            |             |             |   |            |             |            |   |            |             |            |   |            |             |            |   |            |             |            |   |            |             |             |   |            |             |             |   |             |             |            |   |             |             |            |   |             |             |             |   |            |             |            |   |            |             |             |   |            |             |             |   |            |             |            |                                                                                       |
| C                                                                                                                                                                                                                                                                                                                                                                                                                                                                                                                                                                                                                                                                                                                                                                                                                                                                                                                                                                                                                                                                                                                                                                                                                                                                                                                                                                                                                                                                                                                                                                                                                                                                                                                                                                                                                                                                                                                                                                                         | -0.11032200 | -3.47087600 | 0.63103800  |             |                                                                                     |             |             |             |                                                                                     |             |             |             |                                                                                     |             |             |             |   |             |             |             |   |             |             |             |   |            |             |            |   |            |             |             |   |            |             |             |   |            |             |            |   |            |             |            |   |            |             |            |   |            |             |            |   |            |             |             |   |            |             |             |   |             |             |            |   |             |             |            |   |             |             |             |   |            |             |            |   |            |             |             |   |            |             |             |   |            |             |            |                                                                                       |
| C                                                                                                                                                                                                                                                                                                                                                                                                                                                                                                                                                                                                                                                                                                                                                                                                                                                                                                                                                                                                                                                                                                                                                                                                                                                                                                                                                                                                                                                                                                                                                                                                                                                                                                                                                                                                                                                                                                                                                                                         | -0.30591900 | -2.47578400 | -0.35724900 |             |                                                                                     |             |             |             |                                                                                     |             |             |             |                                                                                     |             |             |             |   |             |             |             |   |             |             |             |   |            |             |            |   |            |             |             |   |            |             |             |   |            |             |            |   |            |             |            |   |            |             |            |   |            |             |            |   |            |             |             |   |            |             |             |   |             |             |            |   |             |             |            |   |             |             |             |   |            |             |            |   |            |             |             |   |            |             |             |   |            |             |            |                                                                                       |
| C                                                                                                                                                                                                                                                                                                                                                                                                                                                                                                                                                                                                                                                                                                                                                                                                                                                                                                                                                                                                                                                                                                                                                                                                                                                                                                                                                                                                                                                                                                                                                                                                                                                                                                                                                                                                                                                                                                                                                                                         | -1.50901000 | -2.48587400 | -1.10247500 |             |                                                                                     |             |             |             |                                                                                     |             |             |             |                                                                                     |             |             |             |   |             |             |             |   |             |             |             |   |            |             |            |   |            |             |             |   |            |             |             |   |            |             |            |   |            |             |            |   |            |             |            |   |            |             |            |   |            |             |             |   |            |             |             |   |             |             |            |   |             |             |            |   |             |             |             |   |            |             |            |   |            |             |             |   |            |             |             |   |            |             |            |                                                                                       |
| C                                                                                                                                                                                                                                                                                                                                                                                                                                                                                                                                                                                                                                                                                                                                                                                                                                                                                                                                                                                                                                                                                                                                                                                                                                                                                                                                                                                                                                                                                                                                                                                                                                                                                                                                                                                                                                                                                                                                                                                         | -2.50164700 | -3.43442100 | -0.81381900 |             |                                                                                     |             |             |             |                                                                                     |             |             |             |                                                                                     |             |             |             |   |             |             |             |   |             |             |             |   |            |             |            |   |            |             |             |   |            |             |             |   |            |             |            |   |            |             |            |   |            |             |            |   |            |             |            |   |            |             |             |   |            |             |             |   |             |             |            |   |             |             |            |   |             |             |             |   |            |             |            |   |            |             |             |   |            |             |             |   |            |             |            |                                                                                       |
| C                                                                                                                                                                                                                                                                                                                                                                                                                                                                                                                                                                                                                                                                                                                                                                                                                                                                                                                                                                                                                                                                                                                                                                                                                                                                                                                                                                                                                                                                                                                                                                                                                                                                                                                                                                                                                                                                                                                                                                                         | 1.17624400  | -3.55592200 | 1.38040500  |             |                                                                                     |             |             |             |                                                                                     |             |             |             |                                                                                     |             |             |             |   |             |             |             |   |             |             |             |   |            |             |            |   |            |             |             |   |            |             |             |   |            |             |            |   |            |             |            |   |            |             |            |   |            |             |            |   |            |             |             |   |            |             |             |   |             |             |            |   |             |             |            |   |             |             |             |   |            |             |            |   |            |             |             |   |            |             |             |   |            |             |            |                                                                                       |
| C                                                                                                                                                                                                                                                                                                                                                                                                                                                                                                                                                                                                                                                                                                                                                                                                                                                                                                                                                                                                                                                                                                                                                                                                                                                                                                                                                                                                                                                                                                                                                                                                                                                                                                                                                                                                                                                                                                                                                                                         | 0.71832900  | -1.40950200 | -0.51249600 |             |                                                                                     |             |             |             |                                                                                     |             |             |             |                                                                                     |             |             |             |   |             |             |             |   |             |             |             |   |            |             |            |   |            |             |             |   |            |             |             |   |            |             |            |   |            |             |            |   |            |             |            |   |            |             |            |   |            |             |             |   |            |             |             |   |             |             |            |   |             |             |            |   |             |             |             |   |            |             |            |   |            |             |             |   |            |             |             |   |            |             |            |                                                                                       |
| C                                                                                                                                                                                                                                                                                                                                                                                                                                                                                                                                                                                                                                                                                                                                                                                                                                                                                                                                                                                                                                                                                                                                                                                                                                                                                                                                                                                                                                                                                                                                                                                                                                                                                                                                                                                                                                                                                                                                                                                         | 2.10596300  | -1.72456500 | -0.08556800 |             |                                                                                     |             |             |             |                                                                                     |             |             |             |                                                                                     |             |             |             |   |             |             |             |   |             |             |             |   |            |             |            |   |            |             |             |   |            |             |             |   |            |             |            |   |            |             |            |   |            |             |            |   |            |             |            |   |            |             |             |   |            |             |             |   |             |             |            |   |             |             |            |   |             |             |             |   |            |             |            |   |            |             |             |   |            |             |             |   |            |             |            |                                                                                       |
| C                                                                                                                                                                                                                                                                                                                                                                                                                                                                                                                                                                                                                                                                                                                                                                                                                                                                                                                                                                                                                                                                                                                                                                                                                                                                                                                                                                                                                                                                                                                                                                                                                                                                                                                                                                                                                                                                                                                                                                                         | 2.31290200  | -2.72211900 | 0.89699600  |             |                                                                                     |             |             |             |                                                                                     |             |             |             |                                                                                     |             |             |             |   |             |             |             |   |             |             |             |   |            |             |            |   |            |             |             |   |            |             |             |   |            |             |            |   |            |             |            |   |            |             |            |   |            |             |            |   |            |             |             |   |            |             |             |   |             |             |            |   |             |             |            |   |             |             |             |   |            |             |            |   |            |             |             |   |            |             |             |   |            |             |            |                                                                                       |
| C                                                                                                                                                                                                                                                                                                                                                                                                                                                                                                                                                                                                                                                                                                                                                                                                                                                                                                                                                                                                                                                                                                                                                                                                                                                                                                                                                                                                                                                                                                                                                                                                                                                                                                                                                                                                                                                                                                                                                                                         | 3.58185600  | -2.94025300 | 1.43902300  |             |                                                                                     |             |             |             |                                                                                     |             |             |             |                                                                                     |             |             |             |   |             |             |             |   |             |             |             |   |            |             |            |   |            |             |             |   |            |             |             |   |            |             |            |   |            |             |            |   |            |             |            |   |            |             |            |   |            |             |             |   |            |             |             |   |             |             |            |   |             |             |            |   |             |             |             |   |            |             |            |   |            |             |             |   |            |             |             |   |            |             |            |                                                                                       |
| H                                                                                                                                                                                                                                                                                                                                                                                                                                                                                                                                                                                                                                                                                                                                                                                                                                                                                                                                                                                                                                                                                                                                                                                                                                                                                                                                                                                                                                                                                                                                                                                                                                                                                                                                                                                                                                                                                                                                                                                         | 3.70807800  | -3.70072300 | 2.21026500  |             |                                                                                     |             |             |             |                                                                                     |             |             |             |                                                                                     |             |             |             |   |             |             |             |   |             |             |             |   |            |             |            |   |            |             |             |   |            |             |             |   |            |             |            |   |            |             |            |   |            |             |            |   |            |             |            |   |            |             |             |   |            |             |             |   |             |             |            |   |             |             |            |   |             |             |             |   |            |             |            |   |            |             |             |   |            |             |             |   |            |             |            |                                                                                       |
| C                                                                                                                                                                                                                                                                                                                                                                                                                                                                                                                                                                                                                                                                                                                                                                                                                                                                                                                                                                                                                                                                                                                                                                                                                                                                                                                                                                                                                                                                                                                                                                                                                                                                                                                                                                                                                                                                                                                                                                                         | 4.66616600  | -2.19057200 | 0.98041200  |             |                                                                                     |             |             |             |                                                                                     |             |             |             |                                                                                     |             |             |             |   |             |             |             |   |             |             |             |   |            |             |            |   |            |             |             |   |            |             |             |   |            |             |            |   |            |             |            |   |            |             |            |   |            |             |            |   |            |             |             |   |            |             |             |   |             |             |            |   |             |             |            |   |             |             |             |   |            |             |            |   |            |             |             |   |            |             |             |   |            |             |            |                                                                                       |
| C                                                                                                                                                                                                                                                                                                                                                                                                                                                                                                                                                                                                                                                                                                                                                                                                                                                                                                                                                                                                                                                                                                                                                                                                                                                                                                                                                                                                                                                                                                                                                                                                                                                                                                                                                                                                                                                                                                                                                                                         | 4.49418700  | -1.23401600 | -0.01877800 |             |                                                                                     |             |             |             |                                                                                     |             |             |             |                                                                                     |             |             |             |   |             |             |             |   |             |             |             |   |            |             |            |   |            |             |             |   |            |             |             |   |            |             |            |   |            |             |            |   |            |             |            |   |            |             |            |   |            |             |             |   |            |             |             |   |             |             |            |   |             |             |            |   |             |             |             |   |            |             |            |   |            |             |             |   |            |             |             |   |            |             |            |                                                                                       |
| C                                                                                                                                                                                                                                                                                                                                                                                                                                                                                                                                                                                                                                                                                                                                                                                                                                                                                                                                                                                                                                                                                                                                                                                                                                                                                                                                                                                                                                                                                                                                                                                                                                                                                                                                                                                                                                                                                                                                                                                         | 3.22237500  | -0.99664300 | -0.56256100 |             |                                                                                     |             |             |             |                                                                                     |             |             |             |                                                                                     |             |             |             |   |             |             |             |   |             |             |             |   |            |             |            |   |            |             |             |   |            |             |             |   |            |             |            |   |            |             |            |   |            |             |            |   |            |             |            |   |            |             |             |   |            |             |             |   |             |             |            |   |             |             |            |   |             |             |             |   |            |             |            |   |            |             |             |   |            |             |             |   |            |             |            |                                                                                       |
| H                                                                                                                                                                                                                                                                                                                                                                                                                                                                                                                                                                                                                                                                                                                                                                                                                                                                                                                                                                                                                                                                                                                                                                                                                                                                                                                                                                                                                                                                                                                                                                                                                                                                                                                                                                                                                                                                                                                                                                                         | -3.09377400 | -5.09885500 | 0.41398400  |             |                                                                                     |             |             |             |                                                                                     |             |             |             |                                                                                     |             |             |             |   |             |             |             |   |             |             |             |   |            |             |            |   |            |             |             |   |            |             |             |   |            |             |            |   |            |             |            |   |            |             |            |   |            |             |            |   |            |             |             |   |            |             |             |   |             |             |            |   |             |             |            |   |             |             |             |   |            |             |            |   |            |             |             |   |            |             |             |   |            |             |            |                                                                                       |
| H                                                                                                                                                                                                                                                                                                                                                                                                                                                                                                                                                                                                                                                                                                                                                                                                                                                                                                                                                                                                                                                                                                                                                                                                                                                                                                                                                                                                                                                                                                                                                                                                                                                                                                                                                                                                                                                                                                                                                                                         | -0.94435100 | -5.13910400 | 1.70293500  |             |                                                                                     |             |             |             |                                                                                     |             |             |             |                                                                                     |             |             |             |   |             |             |             |   |             |             |             |   |            |             |            |   |            |             |             |   |            |             |             |   |            |             |            |   |            |             |            |   |            |             |            |   |            |             |            |   |            |             |             |   |            |             |             |   |             |             |            |   |             |             |            |   |             |             |             |   |            |             |            |   |            |             |             |   |            |             |             |   |            |             |            |                                                                                       |
| H                                                                                                                                                                                                                                                                                                                                                                                                                                                                                                                                                                                                                                                                                                                                                                                                                                                                                                                                                                                                                                                                                                                                                                                                                                                                                                                                                                                                                                                                                                                                                                                                                                                                                                                                                                                                                                                                                                                                                                                         | -3.42173600 | -3.45703000 | -1.39720100 |             |                                                                                     |             |             |             |                                                                                     |             |             |             |                                                                                     |             |             |             |   |             |             |             |   |             |             |             |   |            |             |            |   |            |             |             |   |            |             |             |   |            |             |            |   |            |             |            |   |            |             |            |   |            |             |            |   |            |             |             |   |            |             |             |   |             |             |            |   |             |             |            |   |             |             |             |   |            |             |            |   |            |             |             |   |            |             |             |   |            |             |            |                                                                                       |
| H                                                                                                                                                                                                                                                                                                                                                                                                                                                                                                                                                                                                                                                                                                                                                                                                                                                                                                                                                                                                                                                                                                                                                                                                                                                                                                                                                                                                                                                                                                                                                                                                                                                                                                                                                                                                                                                                                                                                                                                         | 5.66294400  | -2.35999500 | 1.39345200  |             |                                                                                     |             |             |             |                                                                                     |             |             |             |                                                                                     |             |             |             |   |             |             |             |   |             |             |             |   |            |             |            |   |            |             |             |   |            |             |             |   |            |             |            |   |            |             |            |   |            |             |            |   |            |             |            |   |            |             |             |   |            |             |             |   |             |             |            |   |             |             |            |   |             |             |             |   |            |             |            |   |            |             |             |   |            |             |             |   |            |             |            |                                                                                       |
| H                                                                                                                                                                                                                                                                                                                                                                                                                                                                                                                                                                                                                                                                                                                                                                                                                                                                                                                                                                                                                                                                                                                                                                                                                                                                                                                                                                                                                                                                                                                                                                                                                                                                                                                                                                                                                                                                                                                                                                                         | 5.35588000  | -0.67942500 | -0.38976900 |             |                                                                                     |             |             |             |                                                                                     |             |             |             |                                                                                     |             |             |             |   |             |             |             |   |             |             |             |   |            |             |            |   |            |             |             |   |            |             |             |   |            |             |            |   |            |             |            |   |            |             |            |   |            |             |            |   |            |             |             |   |            |             |             |   |             |             |            |   |             |             |            |   |             |             |             |   |            |             |            |   |            |             |             |   |            |             |             |   |            |             |            |                                                                                       |
| O                                                                                                                                                                                                                                                                                                                                                                                                                                                                                                                                                                                                                                                                                                                                                                                                                                                                                                                                                                                                                                                                                                                                                                                                                                                                                                                                                                                                                                                                                                                                                                                                                                                                                                                                                                                                                                                                                                                                                                                         | 0.41695100  | -0.27837800 | -0.90425700 |             |                                                                                     |             |             |             |                                                                                     |             |             |             |                                                                                     |             |             |             |   |             |             |             |   |             |             |             |   |            |             |            |   |            |             |             |   |            |             |             |   |            |             |            |   |            |             |            |   |            |             |            |   |            |             |            |   |            |             |             |   |            |             |             |   |             |             |            |   |             |             |            |   |             |             |             |   |            |             |            |   |            |             |             |   |            |             |             |   |            |             |            |                                                                                       |
| O                                                                                                                                                                                                                                                                                                                                                                                                                                                                                                                                                                                                                                                                                                                                                                                                                                                                                                                                                                                                                                                                                                                                                                                                                                                                                                                                                                                                                                                                                                                                                                                                                                                                                                                                                                                                                                                                                                                                                                                         | 1.30892100  | -4.32208900 | 2.32842200  |             |                                                                                     |             |             |             |                                                                                     |             |             |             |                                                                                     |             |             |             |   |             |             |             |   |             |             |             |   |            |             |            |   |            |             |             |   |            |             |             |   |            |             |            |   |            |             |            |   |            |             |            |   |            |             |            |   |            |             |             |   |            |             |             |   |             |             |            |   |             |             |            |   |             |             |             |   |            |             |            |   |            |             |             |   |            |             |             |   |            |             |            |                                                                                       |

|    |             |             |             |
|----|-------------|-------------|-------------|
| O  | 3.02605300  | -0.12840200 | -1.59415100 |
| O  | -1.61951200 | -1.61623600 | -2.14942600 |
| C  | 3.77800700  | 1.07874100  | -1.65562700 |
| H  | 3.55319600  | 1.51953400  | -2.63814900 |
| H  | 4.86432800  | 0.91686800  | -1.60133200 |
| C  | -2.87648200 | -1.04646700 | -2.48352400 |
| C  | 3.39409000  | 2.08974300  | -0.57694100 |
| C  | -3.23318700 | 0.13593100  | -1.60102900 |
| C  | 0.74676900  | 3.77460100  | 0.55420700  |
| H  | -0.11210300 | 3.27197700  | 0.08394500  |
| H  | 0.36661300  | 4.24987600  | 1.47344100  |
| C  | 1.30672100  | 4.84572000  | -0.38516400 |
| H  | 0.45472900  | 5.44819100  | -0.74624400 |
| H  | 1.73452200  | 4.35750600  | -1.27869600 |
| C  | 2.34390100  | 5.76187800  | 0.26396700  |
| H  | 1.91929200  | 6.28494500  | 1.13780100  |
| H  | 3.22427500  | 5.19393500  | 0.60178000  |
| H  | 2.70129900  | 6.52762300  | -0.44353300 |
| C  | -2.42308100 | 1.54152000  | 1.26187100  |
| H  | -3.19116800 | 0.77037100  | 1.47414800  |
| H  | -1.44481000 | 1.10618300  | 1.52126200  |
| C  | -2.68181400 | 2.78319800  | 2.11009500  |
| H  | -1.87407700 | 3.51379000  | 1.93779200  |
| H  | -2.60603100 | 2.47683100  | 3.16676000  |
| C  | -4.04202100 | 3.43936700  | 1.86524800  |
| H  | -4.12717600 | 3.84879800  | 0.84432200  |
| H  | -4.86258400 | 2.71789100  | 2.00436100  |
| H  | -4.20539200 | 4.27721600  | 2.56152700  |
| O  | 4.19671100  | 2.96745000  | -0.23761400 |
| O  | -4.41687400 | 0.54302300  | -1.56626700 |
| N  | 2.16417400  | 1.94199600  | -0.06005200 |
| N  | 1.67534100  | 2.72234100  | 1.00005600  |
| N  | -2.23096600 | 0.72732200  | -0.96381900 |
| N  | -2.39078600 | 1.86863900  | -0.17404700 |
| H  | -1.27179100 | 0.35396900  | -1.03286500 |
| H  | -3.26679800 | 2.30988200  | -0.45780000 |
| H  | 1.55481600  | 1.17898300  | -0.37155000 |
| H  | 2.48969500  | 3.13876700  | 1.45600300  |
| H  | -3.71086500 | -1.76066500 | -2.44976200 |
| H  | -2.79067100 | -0.68631100 | -3.51997600 |
| Li | -5.79460100 | 0.92748700  | -0.48965100 |
| O  | -6.17498200 | 0.61587700  | 1.29667400  |
| H  | -6.71852000 | 1.21756000  | 1.83027900  |
| H  | -5.43519000 | 0.37550200  | 1.87826100  |

**DAAH@1Li@1H<sub>2</sub>O-Type2**

Electronic Energy (EE) = -1684.561873 Hartree

EE + Thermal Free Energy Correction = -1684.093689 Hartree

|   |             |             |             |
|---|-------------|-------------|-------------|
| C | 5.15026800  | -1.49102900 | 0.25744600  |
| C | 4.95444300  | -0.11096600 | 0.35068500  |
| C | 3.78649400  | 0.45627600  | -0.16202200 |
| C | 2.82290200  | -0.33930800 | -0.82486800 |
| C | 3.01036400  | -1.74093900 | -0.86509900 |
| C | 4.17486100  | -2.30168900 | -0.32075900 |
| C | 3.51491700  | 1.89844600  | 0.08599700  |
| C | 1.63632000  | 0.30763000  | -1.42752800 |
| C | 1.18303200  | 1.59137900  | -0.84606200 |
| C | 2.10917800  | 2.36842000  | -0.10568400 |
| C | 1.72929100  | 3.57202000  | 0.48712700  |
| H | 2.46847200  | 4.15299500  | 1.03894300  |
| C | 0.40285500  | 3.99415900  | 0.39301900  |
| C | -0.53173400 | 3.24614200  | -0.31913200 |
| C | -0.14913600 | 2.06410100  | -0.96999800 |
| H | 6.06000500  | -1.94369500 | 0.65742200  |
| H | 5.68735100  | 0.53108800  | 0.84075400  |
| H | 4.30970400  | -3.38365100 | -0.36181400 |
| H | 0.08315800  | 4.91443000  | 0.88602500  |
| H | -1.56421200 | 3.58772600  | -0.35707800 |
| O | 1.04549200  | -0.23468000 | -2.36916100 |
| O | 4.38225000  | 2.65080600  | 0.51251800  |
| O | -1.04360400 | 1.32566200  | -1.69848100 |
| O | 2.04048800  | -2.55021500 | -1.39782800 |
| C | -2.40916500 | 1.74154300  | -1.84259400 |
| H | -2.76728600 | 1.28503500  | -2.77734800 |
| H | -2.49759700 | 2.82902800  | -1.96662800 |
| C | 1.47524700  | -3.53003600 | -0.51772500 |
| C | -3.36365900 | 1.27534000  | -0.75396600 |
| C | 0.76940500  | -2.88656100 | 0.68073500  |
| C | -4.14340600 | -1.43726900 | 0.95633300  |
| H | -3.22986700 | -2.04273100 | 0.84015900  |
| H | -4.63588200 | -1.78366200 | 1.88014700  |
| C | -5.07488300 | -1.66195000 | -0.23967900 |
| H | -5.16732000 | -2.75210000 | -0.38709400 |
| H | -4.60175900 | -1.27087600 | -1.15787500 |
| C | -6.46285600 | -1.04794000 | -0.06363200 |
| H | -6.96227700 | -1.44851700 | 0.83482600  |
| H | -6.40692800 | 0.04677400  | 0.03857100  |
| H | -7.10838900 | -1.26363400 | -0.93024500 |
| C | 0.44062200  | -0.22924100 | 2.14741500  |
| H | 0.93464100  | -0.92640000 | 2.84830000  |
| H | 1.21832400  | 0.15960100  | 1.47824800  |
| C | -0.19600700 | 0.92593600  | 2.91285200  |
| H | -0.64766800 | 1.62643900  | 2.18937600  |

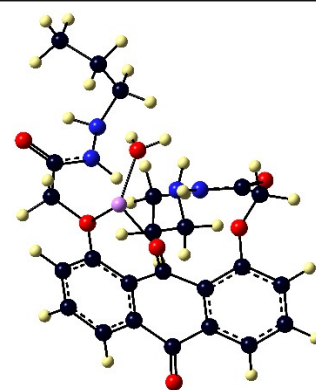

|                                                            |             |             |             |
|------------------------------------------------------------|-------------|-------------|-------------|
| H                                                          | 0.62156100  | 1.47596200  | 3.40931300  |
| C                                                          | -1.23209600 | 0.49554800  | 3.95122800  |
| H                                                          | -2.10061300 | 0.01235000  | 3.47666200  |
| H                                                          | -0.79778400 | -0.21480200 | 4.67519000  |
| H                                                          | -1.60975600 | 1.36251100  | 4.51701000  |
| O                                                          | -4.53710700 | 1.65703200  | -0.82070500 |
| O                                                          | 0.88275100  | -3.33188600 | 1.82019700  |
| N                                                          | -2.89149200 | 0.45170200  | 0.19390400  |
| N                                                          | -3.71339900 | -0.05230200 | 1.21546500  |
| N                                                          | 0.03981400  | -1.79170100 | 0.36739900  |
| N                                                          | -0.54568800 | -0.93546900 | 1.30438200  |
| H                                                          | -0.12143700 | -1.56101700 | -0.60809000 |
| H                                                          | -1.18519700 | -1.47919000 | 1.88915400  |
| H                                                          | -1.89947900 | 0.18952300  | 0.31052700  |
| H                                                          | -4.52140400 | 0.56896900  | 1.28637700  |
| H                                                          | 2.22565700  | -4.23319800 | -0.12772400 |
| H                                                          | 0.74771600  | -4.08975500 | -1.12377600 |
| Li                                                         | -0.70978800 | -0.18632700 | -2.90446800 |
| O                                                          | -1.80879400 | -1.57780900 | -2.31217700 |
| H                                                          | -2.36470700 | -1.45781300 | -1.52472700 |
| H                                                          | -1.53767200 | -2.50938900 | -2.28868500 |
| <b>DAAH@1Li@1H<sub>2</sub>O-Type3</b>                      |             |             |             |
| Electronic Energy (EE) = -1684.538404 Hartree              |             |             |             |
| EE + Thermal Free Energy Correction = -1684.077587 Hartree |             |             |             |
| C                                                          | -3.32958200 | 3.45577400  | -0.33328400 |
| C                                                          | -3.73834000 | 2.23051600  | 0.19530300  |
| C                                                          | -2.97760400 | 1.08444500  | -0.05379600 |
| C                                                          | -1.77909500 | 1.15325200  | -0.80859000 |
| C                                                          | -1.40720300 | 2.39502300  | -1.37566800 |
| C                                                          | -2.18367300 | 3.53862300  | -1.11980800 |
| C                                                          | -3.45109400 | -0.21117300 | 0.48089300  |
| C                                                          | -0.91417500 | -0.05318600 | -0.89547700 |
| C                                                          | -1.55961800 | -1.37722300 | -0.68804600 |
| C                                                          | -2.76561600 | -1.45078300 | 0.05323200  |
| C                                                          | -3.32328500 | -2.68590600 | 0.39690100  |
| H                                                          | -4.24276800 | -2.71940500 | 0.98124200  |
| C                                                          | -2.69948200 | -3.86342800 | -0.01846800 |
| C                                                          | -1.53566500 | -3.81491000 | -0.78166200 |
| C                                                          | -0.96172000 | -2.58033100 | -1.13041000 |
| H                                                          | -3.91924900 | 4.35594700  | -0.14803100 |
| H                                                          | -4.64651100 | 2.15273500  | 0.79303200  |
| H                                                          | -1.89944700 | 4.49582300  | -1.55591200 |
| H                                                          | -3.13141000 | -4.83208600 | 0.24114600  |
| H                                                          | -1.07678000 | -4.74178500 | -1.12483100 |
| O                                                          | 0.30584900  | 0.03959500  | -1.04723100 |
| O                                                          | -4.42876000 | -0.25545200 | 1.23559200  |
| O                                                          | 0.12204700  | -2.49551000 | -1.94802300 |

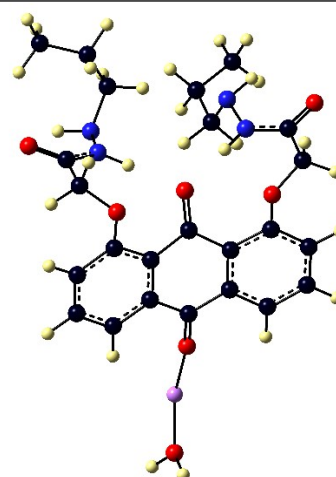

|    |             |             |             |
|----|-------------|-------------|-------------|
| O  | -0.35123500 | 2.41618000  | -2.23075600 |
| C  | 1.15666000  | -3.47039100 | -1.86461900 |
| H  | 1.80713100  | -3.28684200 | -2.73240600 |
| H  | 0.78737600  | -4.50346100 | -1.93505000 |
| C  | 0.48351800  | 3.56621200  | -2.32895300 |
| C  | 2.00287300  | -3.35242200 | -0.59926700 |
| C  | 1.50943700  | 3.64404900  | -1.20559500 |
| C  | 3.89526400  | -1.12010600 | 1.01775700  |
| H  | 3.62073900  | -0.15243300 | 0.57196500  |
| H  | 4.27034700  | -0.90242700 | 2.03122400  |
| C  | 4.99851600  | -1.78290900 | 0.18824200  |
| H  | 5.77585600  | -1.02087300 | 0.00346400  |
| H  | 4.59447700  | -2.05058600 | -0.80418700 |
| C  | 5.62849600  | -3.00836500 | 0.84954800  |
| H  | 6.05705000  | -2.75154200 | 1.83331400  |
| H  | 4.88801900  | -3.80891000 | 1.00076700  |
| H  | 6.43875900  | -3.42443200 | 0.22912500  |
| C  | 2.12960600  | 2.11405800  | 1.72772700  |
| H  | 1.31105200  | 2.83261800  | 1.93555900  |
| H  | 1.67559900  | 1.11065900  | 1.68360100  |
| C  | 3.16329400  | 2.16811600  | 2.84858600  |
| H  | 3.95742500  | 1.42982800  | 2.64614900  |
| H  | 2.66281400  | 1.83981100  | 3.77493400  |
| C  | 3.77889600  | 3.55167200  | 3.06660200  |
| H  | 4.36338600  | 3.88952200  | 2.19459500  |
| H  | 2.99988100  | 4.30843600  | 3.26000100  |
| H  | 4.46391400  | 3.54761000  | 3.92951300  |
| O  | 2.64319100  | -4.32874700 | -0.19042300 |
| O  | 2.09812600  | 4.70661800  | -0.96054000 |
| N  | 1.99071600  | -2.14905400 | -0.00645200 |
| N  | 2.64945300  | -1.88320700 | 1.20536400  |
| N  | 1.76693000  | 2.48459900  | -0.58632800 |
| N  | 2.74265100  | 2.37895700  | 0.41549900  |
| H  | 1.27820800  | 1.61921200  | -0.84184100 |
| H  | 3.21126800  | 3.28776000  | 0.43218600  |
| H  | 1.42370800  | -1.38473600 | -0.38666600 |
| H  | 2.85319900  | -2.79146100 | 1.62732400  |
| H  | -0.07384200 | 4.51260200  | -2.35529000 |
| H  | 1.01967400  | 3.46896000  | -3.28463200 |
| Li | -5.82473100 | -0.64823800 | 2.30199200  |
| O  | -7.58932300 | -0.91507500 | 2.72539600  |
| H  | -7.87815100 | -1.49988500 | 3.44402100  |
| H  | -8.28737700 | -0.97951000 | 2.05413100  |

**DAAH@2Li@2H<sub>2</sub>O-Type-1**

Electronic Energy (EE)= -1768.418994 Hartree

EE + Thermal Free Energy Correction = -1767.932665 Hartree

|   |             |             |             |
|---|-------------|-------------|-------------|
| C | 4.78471500  | 1.49482600  | 0.17416800  |
| C | 3.96957800  | 2.44528000  | 0.79009900  |
| C | 2.60078800  | 2.46833400  | 0.50915200  |
| C | 2.03045600  | 1.52599000  | -0.37875800 |
| C | 2.88481300  | 0.62360100  | -1.05363800 |
| C | 4.25457200  | 0.59492000  | -0.75051900 |
| C | 1.75143800  | 3.50397300  | 1.16250700  |
| C | 0.55109300  | 1.42698300  | -0.47040800 |
| C | -0.23985800 | 2.63695700  | -0.12883800 |
| C | 0.33093600  | 3.61417500  | 0.72250900  |
| C | -0.42645000 | 4.69606500  | 1.17736800  |
| H | 0.03367500  | 5.42232800  | 1.84794300  |
| C | -1.75201000 | 4.83536700  | 0.76326900  |
| C | -2.32235100 | 3.90797600  | -0.10689800 |
| C | -1.57638000 | 2.80995700  | -0.55986300 |
| H | 5.85280300  | 1.46084900  | 0.39978800  |
| H | 4.38058700  | 3.16989100  | 1.49365300  |
| H | 4.91184600  | -0.12890800 | -1.23151400 |
| H | -2.34701600 | 5.68375900  | 1.10810800  |
| H | -3.34828900 | 4.04586000  | -0.44796400 |
| O | -0.00079100 | 0.35234500  | -0.72872100 |
| O | 2.21688700  | 4.26892600  | 1.99986100  |
| O | -2.07302900 | 1.92726900  | -1.47661000 |
| O | 2.33287900  | -0.14661400 | -2.03472100 |
| C | -3.43700000 | 1.53950000  | -1.42565800 |
| H | -3.66371400 | 1.07451800  | -2.39706200 |
| H | -4.12880600 | 2.38375200  | -1.29254300 |
| C | 2.85403400  | -1.44304200 | -2.28232500 |
| C | -3.72762600 | 0.51089900  | -0.34443800 |
| C | 2.55255700  | -2.40095400 | -1.14108600 |
| C | -2.63701700 | -2.44543100 | 0.71955900  |
| H | -1.66951000 | -2.50264600 | 0.19959200  |
| H | -2.54811500 | -3.08235100 | 1.61412800  |
| C | -3.76247000 | -2.96405500 | -0.18024600 |
| H | -3.42298000 | -3.91004500 | -0.63609000 |
| H | -3.91261700 | -2.26012100 | -1.01831000 |
| C | -5.07901900 | -3.19560000 | 0.56101200  |
| H | -4.97241700 | -3.99010500 | 1.31827100  |
| H | -5.41218900 | -2.28423100 | 1.08461300  |
| H | -5.88458300 | -3.48702900 | -0.13025500 |
| C | 0.83226600  | -2.25804400 | 1.83972300  |
| H | 1.76270700  | -1.72033300 | 2.11079400  |
| H | 0.04879100  | -1.49880600 | 1.68915200  |
| C | 0.42631300  | -3.20040500 | 2.96772100  |
| H | -0.49778200 | -3.72932600 | 2.67837300  |

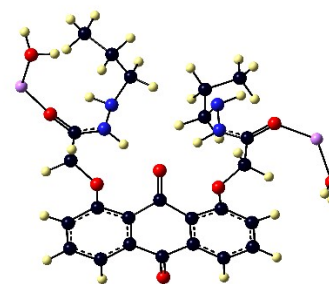

|                                                            |             |             |             |
|------------------------------------------------------------|-------------|-------------|-------------|
| H                                                          | 0.16869300  | -2.57702000 | 3.84003300  |
| C                                                          | 1.50749300  | -4.20778900 | 3.36256800  |
| H                                                          | 1.74321700  | -4.90851100 | 2.54399800  |
| H                                                          | 2.44285900  | -3.69542100 | 3.64448400  |
| H                                                          | 1.18640400  | -4.81600700 | 4.22320400  |
| O                                                          | -4.91109800 | 0.29678400  | 0.00352500  |
| O                                                          | 3.28857400  | -3.39517600 | -0.91752400 |
| N                                                          | -2.68693800 | -0.12081100 | 0.17950500  |
| N                                                          | -2.78125100 | -1.06367200 | 1.21273000  |
| N                                                          | 1.45126500  | -2.15444500 | -0.44840500 |
| N                                                          | 0.99095700  | -2.98993000 | 0.57323300  |
| H                                                          | 0.87121900  | -1.32855500 | -0.65617000 |
| H                                                          | 1.68848300  | -3.73102200 | 0.66879200  |
| H                                                          | -1.73358900 | 0.08009800  | -0.15519800 |
| H                                                          | -3.69450100 | -0.93259500 | 1.65201400  |
| H                                                          | 3.93592500  | -1.44622600 | -2.47730900 |
| H                                                          | 2.34817700  | -1.80411500 | -3.19010600 |
| Li                                                         | -6.49747200 | -0.21850800 | -0.65461100 |
| Li                                                         | 5.08729700  | -3.59170300 | -1.04810300 |
| O                                                          | 6.36348400  | -2.32867300 | -1.53994300 |
| O                                                          | -6.78531100 | -1.59758800 | -1.86944100 |
| H                                                          | 6.72209800  | -1.68455400 | -0.90828300 |
| H                                                          | 6.26454300  | -1.83096600 | -2.36767600 |
| H                                                          | -5.97639200 | -2.07168300 | -2.12413400 |
| H                                                          | -7.41519600 | -2.30293000 | -1.64892700 |
| <b>DAAH@2Li@2H<sub>2</sub>O-Type-2</b>                     |             |             |             |
| Electronic Energy (EE)= -1768.438617 Hartree               |             |             |             |
| EE + Thermal Free Energy Correction = -1767.941708 Hartree |             |             |             |
| C                                                          | 5.16072400  | 1.38961000  | -0.72532300 |
| C                                                          | 5.02916500  | 0.03634900  | -0.40594200 |
| C                                                          | 3.86110500  | -0.42321400 | 0.20389600  |
| C                                                          | 2.82146300  | 0.46911100  | 0.55522700  |
| C                                                          | 2.95972400  | 1.82447500  | 0.18226900  |
| C                                                          | 4.12040500  | 2.27653400  | -0.45222600 |
| C                                                          | 3.67685200  | -1.88406900 | 0.40627800  |
| C                                                          | 1.63835600  | -0.04025800 | 1.28667600  |
| C                                                          | 1.27627600  | -1.45649200 | 1.09687400  |
| C                                                          | 2.27974900  | -2.35457400 | 0.64036800  |
| C                                                          | 1.99079500  | -3.68872700 | 0.36968600  |
| H                                                          | 2.79058000  | -4.35110200 | 0.03784800  |
| C                                                          | 0.67534600  | -4.14353100 | 0.48384200  |
| C                                                          | -0.33208600 | -3.29104100 | 0.92296900  |
| C                                                          | -0.03920900 | -1.96565900 | 1.27854600  |
| H                                                          | 6.07064900  | 1.75525300  | -1.20515200 |
| H                                                          | 5.81698800  | -0.67850700 | -0.64638200 |
| H                                                          | 4.20032400  | 3.33057600  | -0.72239800 |
| H                                                          | 0.42623900  | -5.17398900 | 0.22300200  |

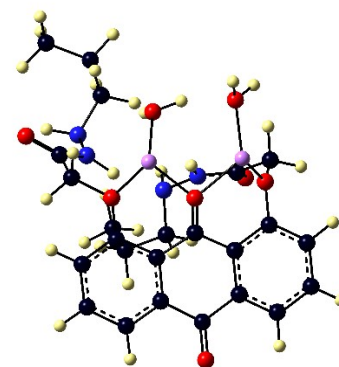



|    |             |             |             |
|----|-------------|-------------|-------------|
| H  | -1.35203700 | -3.66623800 | 0.98118900  |
| O  | 0.97791100  | 0.73363800  | 2.01560600  |
| O  | 4.60595100  | -2.67217400 | 0.29533400  |
| O  | -1.00375800 | -1.13063500 | 1.76314400  |
| O  | 1.93050800  | 2.71468400  | 0.42898700  |
| C  | -2.34722700 | -1.57647200 | 2.02262300  |
| H  | -2.69635200 | -1.00826300 | 2.89767700  |
| H  | -2.37886400 | -2.63621100 | 2.30357800  |
| C  | 1.32216500  | 3.33680100  | -0.72584000 |
| C  | -3.35793900 | -1.31225300 | 0.91865600  |
| C  | 0.64246400  | 2.31826800  | -1.64283100 |
| C  | -4.19209600 | 1.00554100  | -1.30595000 |
| H  | -3.25926800 | 1.58488000  | -1.39806300 |
| H  | -4.74273000 | 1.14317700  | -2.25129100 |
| C  | -5.02862300 | 1.54351500  | -0.14026900 |
| H  | -5.11082800 | 2.63651300  | -0.27213900 |
| H  | -4.48510700 | 1.39383200  | 0.80884800  |
| C  | -6.42506500 | 0.93055300  | -0.04488500 |
| H  | -6.99098400 | 1.08184500  | -0.97976800 |
| H  | -6.37497600 | -0.15148500 | 0.15091700  |
| H  | -7.00387500 | 1.38556600  | 0.77498200  |
| C  | 0.31965100  | -0.68083500 | -2.25295500 |
| H  | 0.88124500  | -0.21114200 | -3.08066700 |
| H  | 1.04418200  | -0.93460400 | -1.46869100 |
| C  | -0.37772800 | -1.94708100 | -2.74185500 |
| H  | -0.87657000 | -2.43446200 | -1.88652100 |
| H  | 0.40870300  | -2.64194400 | -3.08180300 |
| C  | -1.38322400 | -1.71237300 | -3.87028900 |
| H  | -2.24447100 | -1.11995800 | -3.52303700 |
| H  | -0.91744400 | -1.17900700 | -4.71627600 |
| H  | -1.77882300 | -2.66724700 | -4.25219500 |
| O  | -4.52784600 | -1.65351100 | 1.13035200  |
| O  | 0.73306200  | 2.39968700  | -2.86390900 |
| N  | -2.93864400 | -0.70573500 | -0.19867200 |
| N  | -3.81593600 | -0.41804600 | -1.25822500 |
| N  | -0.04291800 | 1.34108900  | -1.00444000 |
| N  | -0.64697100 | 0.26754500  | -1.66437400 |
| H  | -0.24123600 | 1.41791500  | -0.01197400 |
| H  | -1.25984200 | 0.64265200  | -2.39287800 |
| H  | -1.95077700 | -0.50304200 | -0.43051800 |
| H  | -4.64376600 | -1.00263800 | -1.12776400 |
| H  | 2.06554500  | 3.88627600  | -1.31774000 |
| H  | 0.58170900  | 4.04569400  | -0.33066800 |
| Li | -0.77547800 | 0.50929600  | 2.69787700  |
| Li | 1.21313100  | 2.69958300  | 2.20666300  |
| O  | -0.25982200 | 3.87223400  | 2.35618100  |
| O  | -1.97883800 | 1.74445300  | 1.96998100  |
| H  | -0.56793500 | 4.22123900  | 3.20954700  |
| H  | -2.30919200 | 1.55477200  | 1.07776700  |
| H  | -1.57101000 | 2.63615400  | 1.92536000  |

|                                                            |             |             |             |                                                                                     |
|------------------------------------------------------------|-------------|-------------|-------------|-------------------------------------------------------------------------------------|
| H                                                          | -0.29534600 | 4.63081700  | 1.74889700  |                                                                                     |
| <b>DAAH@2Li@4H<sub>2</sub>O-Type2-model (syn)</b>          |             |             |             |                                                                                     |
| Electronic Energy (EE) = -1921.246268 Hartree              |             |             |             |                                                                                     |
| EE + Thermal Free Energy Correction = -1920.707818 Hartree |             |             |             |                                                                                     |
| C                                                          | -5.49185000 | 0.15659300  | -0.44159600 | 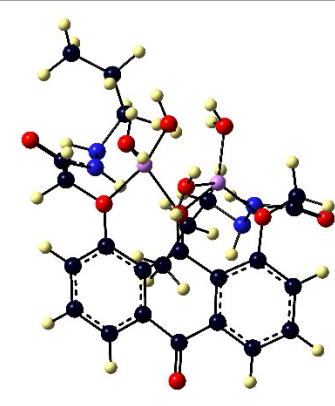 |
| C                                                          | -4.86701600 | 1.38477600  | -0.22977000 |                                                                                     |
| C                                                          | -3.53411900 | 1.42939400  | 0.18189000  |                                                                                     |
| C                                                          | -2.78958900 | 0.24554100  | 0.41605200  |                                                                                     |
| C                                                          | -3.43951700 | -0.99045600 | 0.15213400  |                                                                                     |
| C                                                          | -4.77386700 | -1.02287400 | -0.26702900 |                                                                                     |
| C                                                          | -2.89667800 | 2.76435800  | 0.31658000  |                                                                                     |
| C                                                          | -1.38556400 | 0.33154300  | 0.89544300  |                                                                                     |
| C                                                          | -0.70246400 | 1.64113900  | 0.91962100  |                                                                                     |
| C                                                          | -1.43675900 | 2.81888400  | 0.60745500  |                                                                                     |
| C                                                          | -0.83295800 | 4.07387600  | 0.58471300  |                                                                                     |
| H                                                          | -1.43518600 | 4.94832500  | 0.33967100  |                                                                                     |
| C                                                          | 0.52663400  | 4.19303500  | 0.86849600  |                                                                                     |
| C                                                          | 1.27137800  | 3.06946600  | 1.20430100  |                                                                                     |
| C                                                          | 0.67503500  | 1.79982200  | 1.25312100  |                                                                                     |
| H                                                          | -6.53664400 | 0.11518500  | -0.75540900 |                                                                                     |
| H                                                          | -5.40020500 | 2.32193500  | -0.39026100 |                                                                                     |
| H                                                          | -5.24819900 | -1.98803700 | -0.44741100 |                                                                                     |
| H                                                          | 1.01547500  | 5.16839700  | 0.83152100  |                                                                                     |
| H                                                          | 2.33159200  | 3.18766400  | 1.41767700  |                                                                                     |
| O                                                          | -0.80088700 | -0.70637100 | 1.26609200  |                                                                                     |
| O                                                          | -3.54608100 | 3.79208300  | 0.16464400  |                                                                                     |
| O                                                          | 1.41728200  | 0.70820000  | 1.59872500  |                                                                                     |
| O                                                          | -2.76588500 | -2.18778200 | 0.27369400  |                                                                                     |
| C                                                          | 2.76908400  | 0.84005800  | 2.06754800  |                                                                                     |
| H                                                          | 2.96034500  | -0.05957600 | 2.67047600  |                                                                                     |
| H                                                          | 2.88965700  | 1.70679300  | 2.73137400  |                                                                                     |
| C                                                          | -2.73319900 | -3.03520300 | -0.90205500 |                                                                                     |
| C                                                          | 3.82601300  | 0.87194700  | 0.97112600  |                                                                                     |
| C                                                          | -2.24464200 | -2.25334100 | -2.12731500 |                                                                                     |
| C                                                          | 4.46320400  | -0.63435000 | -1.92754400 |                                                                                     |
| H                                                          | 3.48367300  | -1.01784300 | -2.25454800 |                                                                                     |
| H                                                          | 5.07020600  | -0.51393900 | -2.83960200 |                                                                                     |
| C                                                          | 5.13191600  | -1.63834700 | -0.98516900 |                                                                                     |
| H                                                          | 5.06572400  | -2.63255900 | -1.46002000 |                                                                                     |
| H                                                          | 4.54442300  | -1.70676600 | -0.05283100 |                                                                                     |
| C                                                          | 6.59032100  | -1.31443800 | -0.66370800 |                                                                                     |
| H                                                          | 7.19800400  | -1.26651500 | -1.58320500 |                                                                                     |
| H                                                          | 6.68068400  | -0.34753700 | -0.14519000 |                                                                                     |
| H                                                          | 7.03394500  | -2.08089200 | -0.00794900 |                                                                                     |
| C                                                          | 0.65960600  | -0.21124200 | -2.62331800 |                                                                                     |
| H                                                          | 0.98235000  | -0.19361000 | -1.56167200 |                                                                                     |
| H                                                          | 1.15804700  | -1.07203300 | -3.09597000 |                                                                                     |

|                                                            |             |             |             |
|------------------------------------------------------------|-------------|-------------|-------------|
| C                                                          | 1.09538500  | 1.09105000  | -3.28659000 |
| H                                                          | 0.74425800  | 1.09826100  | -4.33257000 |
| H                                                          | 2.19661400  | 1.08581400  | -3.31907700 |
| C                                                          | 0.62684100  | 2.35011500  | -2.55346500 |
| H                                                          | -0.47169000 | 2.43440800  | -2.51510200 |
| H                                                          | 0.99928400  | 2.35885100  | -1.51705600 |
| H                                                          | 1.00235300  | 3.25848000  | -3.05029100 |
| O                                                          | 5.01027500  | 1.00268800  | 1.29055900  |
| O                                                          | -2.82249800 | -2.32884400 | -3.20726700 |
| N                                                          | 3.39282000  | 0.73938200  | -0.29199400 |
| N                                                          | 4.24465700  | 0.72698900  | -1.40541000 |
| N                                                          | -1.17660200 | -1.46969300 | -1.86308700 |
| N                                                          | -0.78699700 | -0.41728200 | -2.70043500 |
| H                                                          | -0.76665800 | -1.50168300 | -0.92832900 |
| H                                                          | -1.26009100 | 0.42137900  | -2.35097700 |
| H                                                          | 2.40217800  | 0.67986900  | -0.50644100 |
| H                                                          | 5.12788800  | 1.14013900  | -1.09996000 |
| H                                                          | -3.72388300 | -3.45069900 | -1.12608800 |
| H                                                          | -2.04182500 | -3.85145000 | -0.65257700 |
| Li                                                         | 1.01661300  | -1.18410400 | 1.61410000  |
| Li                                                         | -1.52828900 | -2.50693600 | 1.71950400  |
| O                                                          | 1.06649600  | -1.92130700 | 3.36510200  |
| H                                                          | 1.48395200  | -2.79326400 | 3.44576100  |
| O                                                          | -0.26069400 | -3.78957400 | 1.11621700  |
| H                                                          | 0.20278100  | -4.24980000 | 1.83431000  |
| H                                                          | 0.46610900  | -3.39944800 | 0.58460800  |
| H                                                          | 0.14058900  | -2.07086500 | 3.66006400  |
| O                                                          | -1.67336500 | -2.37662000 | 3.62167600  |
| H                                                          | -2.14086500 | -1.61324800 | 3.99970400  |
| O                                                          | 1.86106400  | -2.21689900 | 0.23414800  |
| H                                                          | 1.95986100  | -1.85358800 | -0.66067900 |
| H                                                          | -1.91869900 | -3.12776800 | 4.18685900  |
| H                                                          | 2.69301600  | -2.68969800 | 0.40259600  |
| <b>DAAH@2Li@4H<sub>2</sub>O-Type2-mode2 (anti)</b>         |             |             |             |
| Electronic Energy (EE) = -1921.260486 Hartree              |             |             |             |
| EE + Thermal Free Energy Correction = -1920.720399 Hartree |             |             |             |
| C                                                          | -2.50356100 | 3.23058100  | -3.14462400 |
| C                                                          | -3.54255200 | 2.68313500  | -2.38993200 |
| C                                                          | -3.25672400 | 1.77107200  | -1.37430300 |
| C                                                          | -1.92245700 | 1.37998300  | -1.09185800 |
| C                                                          | -0.87952000 | 1.97019200  | -1.86112200 |
| C                                                          | -1.18154000 | 2.88164700  | -2.88294400 |
| C                                                          | -4.39620600 | 1.23255700  | -0.57866900 |
| C                                                          | -1.64525100 | 0.41938700  | -0.00591100 |
| C                                                          | -2.75463500 | -0.05711900 | 0.85023600  |
| C                                                          | -4.09043400 | 0.32134800  | 0.55918100  |
| C                                                          | -5.15847400 | -0.16885100 | 1.31224200  |

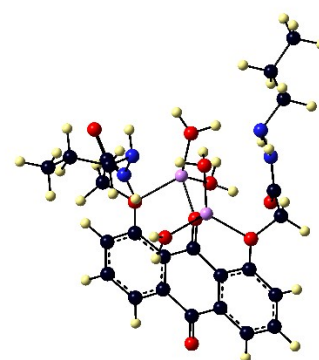

|    |             |             |             |
|----|-------------|-------------|-------------|
| H  | -6.17211600 | 0.13884200  | 1.05459800  |
| C  | -4.92163900 | -1.03650100 | 2.38003800  |
| C  | -3.61991600 | -1.42185200 | 2.68768400  |
| C  | -2.54226400 | -0.95187000 | 1.92821200  |
| H  | -2.72261400 | 3.93497600  | -3.94970000 |
| H  | -4.58020000 | 2.95718100  | -2.58053500 |
| H  | -0.38062600 | 3.30575200  | -3.48778200 |
| H  | -5.75345900 | -1.40869900 | 2.98146900  |
| H  | -3.41995800 | -2.08724300 | 3.52922200  |
| O  | -5.55191100 | 1.53809000  | -0.84841900 |
| O  | -1.27013000 | -1.32801500 | 2.30328600  |
| O  | 0.41032200  | 1.61610700  | -1.60209200 |
| C  | -0.92897600 | -2.72939500 | 2.25630600  |
| H  | -1.79951500 | -3.35211700 | 2.50612700  |
| H  | -0.14661500 | -2.88554900 | 3.00890400  |
| C  | 1.50368600  | 2.45661500  | -1.99959400 |
| C  | -0.47319700 | -3.08731500 | 0.84721700  |
| C  | 2.69003100  | 2.20187100  | -1.07467900 |
| C  | 2.22191400  | -4.91105000 | -0.52606600 |
| H  | 2.98843300  | -4.83962000 | 0.26308400  |
| H  | 1.58228700  | -5.78138400 | -0.29022700 |
| C  | 2.88118800  | -5.07644000 | -1.88969900 |
| H  | 3.50718700  | -4.19035700 | -2.09262100 |
| H  | 2.09655200  | -5.09141900 | -2.66714200 |
| C  | 3.72011200  | -6.34976700 | -1.97352100 |
| H  | 4.52424400  | -6.34776100 | -1.21900700 |
| H  | 3.10279500  | -7.24691300 | -1.80080100 |
| H  | 4.18924400  | -6.45203800 | -2.96455700 |
| O  | -1.25697000 | -3.02695600 | -0.11421700 |
| O  | 3.84149700  | 2.17672300  | -1.51400300 |
| N  | 0.81424200  | -3.43864300 | 0.73646800  |
| N  | 1.43708700  | -3.66519300 | -0.50230100 |
| N  | 2.38478600  | 2.03594100  | 0.22505500  |
| N  | 3.35784500  | 1.69180700  | 1.18024400  |
| H  | 1.22116100  | 3.51832500  | -1.91715200 |
| H  | 1.80959400  | 2.23630300  | -3.03166900 |
| Li | 0.29303700  | -0.09743500 | 1.99478700  |
| Li | 0.72416900  | -0.34934100 | -1.29307500 |
| C  | 3.75942600  | 2.82817700  | 2.02915100  |
| H  | 4.44642100  | 2.41390700  | 2.78504200  |
| H  | 2.86041600  | 3.17068300  | 2.56836400  |
| C  | 4.41709000  | 3.99618000  | 1.29588600  |
| H  | 5.30677500  | 3.62554400  | 0.75810200  |
| H  | 3.72370000  | 4.38034400  | 0.52834000  |
| C  | 4.80521100  | 5.12330700  | 2.25072200  |
| H  | 5.52607900  | 4.77570800  | 3.00972600  |
| H  | 5.26834300  | 5.96427000  | 1.71068200  |
| H  | 3.92310400  | 5.51387900  | 2.78555400  |
| H  | 1.42281900  | 1.99979500  | 0.56701400  |
| H  | 4.16827200  | 1.35434900  | 0.65196400  |

|                                                            |             |             |             |
|------------------------------------------------------------|-------------|-------------|-------------|
| O                                                          | -0.48876300 | 0.00256800  | 0.18640700  |
| O                                                          | 2.10256200  | -0.65874900 | 1.92002800  |
| H                                                          | 2.23938300  | -0.97789000 | 0.99998000  |
| O                                                          | 2.36398500  | -1.15139000 | -0.81792000 |
| H                                                          | 2.23439900  | -2.14842000 | -0.82574600 |
| H                                                          | 3.26466100  | -0.96309700 | -1.12161000 |
| H                                                          | 2.62734100  | 0.18778200  | 1.89246900  |
| O                                                          | -0.45499100 | -1.50006300 | -2.27302600 |
| H                                                          | -0.84995300 | -2.08512500 | -1.58504100 |
| O                                                          | 0.23021900  | 1.78349300  | 2.29814600  |
| H                                                          | 0.71394100  | 2.30622000  | 2.95658400  |
| H                                                          | -0.03947300 | -2.11497400 | -2.89702400 |
| H                                                          | -0.53018800 | 2.33035400  | 2.04507800  |
| H                                                          | 1.45459900  | -3.31015300 | 1.51913700  |
| H                                                          | 0.68920200  | -3.70832900 | -1.20145200 |
| <b>DAAH@1Li@1Cl-Type1</b>                                  |             |             |             |
| Electronic Energy (EE) = -2068.412211 Hartree              |             |             |             |
| EE + Thermal Free Energy Correction = -2067.971980 Hartree |             |             |             |
| C                                                          | 3.29917700  | -3.34547500 | 0.37551400  |
| C                                                          | 2.25839700  | -3.75077600 | -0.46047800 |
| C                                                          | 0.99649600  | -3.16603100 | -0.32735000 |
| C                                                          | 0.76946000  | -2.13890800 | 0.62035600  |
| C                                                          | 1.82343700  | -1.77451000 | 1.49045700  |
| C                                                          | 3.08315300  | -2.37671600 | 1.35422800  |
| C                                                          | -0.10890300 | -3.65342100 | -1.20115000 |
| C                                                          | -0.53127400 | -1.41841300 | 0.59659400  |
| C                                                          | -1.70362500 | -2.13973000 | 0.03762300  |
| C                                                          | -1.48915900 | -3.17935200 | -0.89859900 |
| C                                                          | -2.56364300 | -3.77775700 | -1.56112000 |
| H                                                          | -2.36863800 | -4.56280000 | -2.29211500 |
| C                                                          | -3.86636900 | -3.36826200 | -1.27269300 |
| C                                                          | -4.10433600 | -2.37656600 | -0.32259400 |
| C                                                          | -3.03325100 | -1.76160800 | 0.34391900  |
| H                                                          | 4.28745700  | -3.80062000 | 0.28135000  |
| H                                                          | 2.40908400  | -4.52495400 | -1.21330500 |
| H                                                          | 3.89521400  | -2.10186100 | 2.02694600  |
| H                                                          | -4.71209500 | -3.83604900 | -1.78133600 |
| H                                                          | -5.12913900 | -2.09172700 | -0.08554500 |
| O                                                          | -0.61885900 | -0.23760000 | 0.94633800  |
| O                                                          | 0.10347800  | -4.45558200 | -2.10392000 |
| O                                                          | -3.22096800 | -0.85646000 | 1.34399000  |
| O                                                          | 1.55021700  | -0.89036400 | 2.49587500  |
| C                                                          | -4.30403900 | 0.06354600  | 1.28962100  |
| H                                                          | -4.37762300 | 0.50186200  | 2.29597900  |
| H                                                          | -5.26999100 | -0.41131700 | 1.06451600  |
| C                                                          | 2.54714500  | 0.04274900  | 2.89323400  |
| C                                                          | -4.08980500 | 1.20052300  | 0.29495800  |

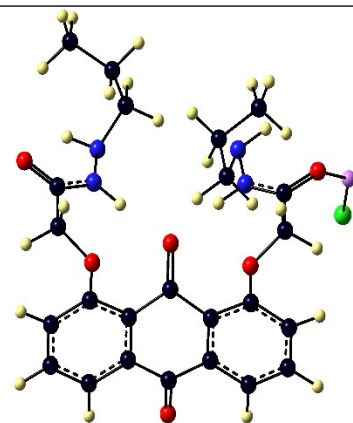

|                                                            |             |             |             |
|------------------------------------------------------------|-------------|-------------|-------------|
| C                                                          | 2.76395800  | 1.12010800  | 1.84358700  |
| C                                                          | -1.73098700 | 3.47711200  | -0.49364100 |
| H                                                          | -0.78218800 | 3.07868600  | -0.10271100 |
| H                                                          | -1.46705800 | 4.13257500  | -1.33983800 |
| C                                                          | -2.44569100 | 4.28666700  | 0.59101800  |
| H                                                          | -1.71217300 | 4.99577400  | 1.01309500  |
| H                                                          | -2.72730900 | 3.61060300  | 1.41799100  |
| C                                                          | -3.67440500 | 5.04871500  | 0.09457100  |
| H                                                          | -3.40869300 | 5.74063100  | -0.72296600 |
| H                                                          | -4.44696700 | 4.36024800  | -0.28129000 |
| H                                                          | -4.13013900 | 5.64366200  | 0.90253100  |
| C                                                          | 1.71160600  | 1.77276100  | -1.27256400 |
| H                                                          | 2.57369000  | 1.09194300  | -1.41015600 |
| H                                                          | 0.79059700  | 1.17278900  | -1.34832300 |
| C                                                          | 1.72177100  | 2.84895400  | -2.35427200 |
| H                                                          | 0.83152700  | 3.49061600  | -2.23601500 |
| H                                                          | 1.61076400  | 2.33610100  | -3.32464700 |
| C                                                          | 2.99256100  | 3.70240700  | -2.37400600 |
| H                                                          | 3.08494600  | 4.32303700  | -1.46638200 |
| H                                                          | 3.89158000  | 3.06723100  | -2.43620000 |
| H                                                          | 2.99086400  | 4.39182100  | -3.23368500 |
| O                                                          | -5.05530500 | 1.88037900  | -0.08020900 |
| O                                                          | 3.85827500  | 1.73042600  | 1.77591800  |
| N                                                          | -2.82807000 | 1.38696800  | -0.11491900 |
| N                                                          | -2.47358700 | 2.34721500  | -1.07730600 |
| N                                                          | 1.72289300  | 1.39186100  | 1.06922700  |
| N                                                          | 1.72923700  | 2.37321500  | 0.07535800  |
| H                                                          | 0.85055100  | 0.84881300  | 1.15354600  |
| H                                                          | 2.57623700  | 2.92751400  | 0.21151800  |
| H                                                          | -2.06404500 | 0.80103500  | 0.23789400  |
| H                                                          | -3.35108600 | 2.67519600  | -1.48619700 |
| H                                                          | 3.51847400  | -0.41944800 | 3.11790500  |
| H                                                          | 2.17625400  | 0.51191900  | 3.81667900  |
| Li                                                         | 5.16423000  | 1.67478800  | 0.50895100  |
| Cl                                                         | 5.47347900  | 0.89088600  | -1.45410800 |
| <b>DAAH@1Li@1Cl-Type2</b>                                  |             |             |             |
| Electronic Energy (EE) = -2068.425835 Hartree              |             |             |             |
| EE + Thermal Free Energy Correction = -2067.982896 Hartree |             |             |             |
| C                                                          | 5.13077500  | -1.36992700 | 0.56251000  |
| C                                                          | 4.92648000  | 0.01249600  | 0.57188400  |
| C                                                          | 3.79671800  | 0.54841500  | -0.05011500 |
| C                                                          | 2.88664100  | -0.28718500 | -0.73717500 |
| C                                                          | 3.09159400  | -1.68552200 | -0.71687500 |
| C                                                          | 4.20897400  | -2.21465900 | -0.05504000 |
| C                                                          | 3.51035700  | 2.00330100  | 0.08915400  |
| C                                                          | 1.72536800  | 0.31514300  | -1.42676600 |
| C                                                          | 1.22117600  | 1.60702000  | -0.90726200 |

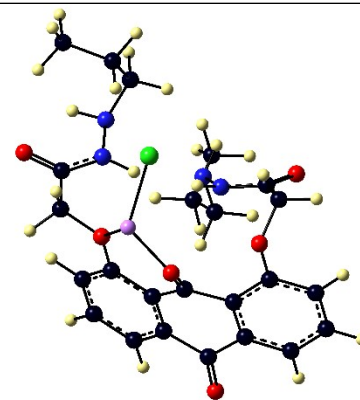

|   |             |             |             |
|---|-------------|-------------|-------------|
| C | 2.11426700  | 2.45050900  | -0.20311400 |
| C | 1.69833800  | 3.69252000  | 0.27809600  |
| H | 2.41128600  | 4.32791100  | 0.80425900  |
| C | 0.37000300  | 4.08409800  | 0.10759400  |
| C | -0.53871300 | 3.25818800  | -0.55335300 |
| C | -0.12073800 | 2.02759000  | -1.08134500 |
| H | 6.00684900  | -1.79619300 | 1.05591800  |
| H | 5.62182900  | 0.68158800  | 1.08039300  |
| H | 4.34920100  | -3.29682700 | -0.03794500 |
| H | 0.02597300  | 5.04153400  | 0.50407500  |
| H | -1.57389200 | 3.58262200  | -0.64762100 |
| O | 1.20985900  | -0.24656700 | -2.39811800 |
| O | 4.35300800  | 2.78583400  | 0.51131800  |
| O | -0.98432100 | 1.18566400  | -1.72567400 |
| O | 2.17541500  | -2.51601600 | -1.30507200 |
| C | -2.35324500 | 1.55767700  | -1.92376100 |
| H | -2.74073500 | 0.86309900  | -2.68427500 |
| H | -2.43584700 | 2.57627800  | -2.32701900 |
| C | 1.51161100  | -3.44972600 | -0.44124800 |
| C | -3.27755600 | 1.42072300  | -0.72320100 |
| C | 0.85077200  | -2.74441100 | 0.74671000  |
| C | -4.12665900 | -0.96356400 | 1.53182300  |
| H | -3.24016000 | -1.54356800 | 1.83070100  |
| H | -4.82531700 | -0.99803500 | 2.38375200  |
| C | -4.76106600 | -1.61118900 | 0.29779500  |
| H | -4.92680000 | -2.67585400 | 0.53959300  |
| H | -4.03260500 | -1.59857200 | -0.53208500 |
| C | -6.07830700 | -0.97082100 | -0.13896300 |
| H | -6.82124200 | -0.98995800 | 0.67696100  |
| H | -5.93453500 | 0.07856000  | -0.43796100 |
| H | -6.51421000 | -1.50366800 | -0.99963000 |
| C | 0.30722500  | -0.03884300 | 2.09729100  |
| H | 1.07620800  | -0.62644000 | 2.63073500  |
| H | 0.82635800  | 0.59034900  | 1.36495800  |
| C | -0.45428500 | 0.84031600  | 3.08499600  |
| H | -1.17786000 | 1.46242400  | 2.53223400  |
| H | 0.27733900  | 1.53283300  | 3.53433600  |
| C | -1.17169800 | 0.06670400  | 4.19281400  |
| H | -1.97826500 | -0.57166400 | 3.79671300  |
| H | -0.46938500 | -0.58213600 | 4.74287800  |
| H | -1.63332700 | 0.75422600  | 4.91951900  |
| O | -4.38473900 | 1.97986100  | -0.78519500 |
| O | 1.07892500  | -3.07119900 | 1.91084400  |
| N | -2.87926400 | 0.66952500  | 0.30563400  |
| N | -3.72089000 | 0.44922800  | 1.41301400  |
| N | 0.04664200  | -1.71339200 | 0.39751800  |
| N | -0.60863100 | -0.91988900 | 1.34858200  |
| H | -0.35249100 | -1.68842800 | -0.54934000 |
| H | -1.08793900 | -1.54196000 | 2.00497200  |
| H | -1.95447400 | 0.21577400  | 0.39551000  |

|                                                            |             |             |             |  |
|------------------------------------------------------------|-------------|-------------|-------------|--|
| H                                                          | -4.54283500 | 1.03558400  | 1.25479300  |  |
| H                                                          | 2.19895300  | -4.21262000 | -0.04665700 |  |
| H                                                          | 0.74605200  | -3.93148900 | -1.06681900 |  |
| Li                                                         | -0.56537700 | -0.36352700 | -2.87369400 |  |
| Cl                                                         | -1.75649200 | -2.10157800 | -2.33144800 |  |
| <b>DAAH@1Li@1Cl-Type3</b>                                  |             |             |             |  |
| Electronic Energy (EE) = -2068.399708 Hartree              |             |             |             |  |
| EE + Thermal Free Energy Correction = -2067.963992 Hartree |             |             |             |  |
| C                                                          | -2.90746900 | 3.53575500  | -0.69751100 |  |
| C                                                          | -3.38462800 | 2.33595500  | -0.16813300 |  |
| C                                                          | -2.65115200 | 1.16052300  | -0.35392600 |  |
| C                                                          | -1.41210400 | 1.17505800  | -1.04225900 |  |
| C                                                          | -0.96778500 | 2.39160400  | -1.61112800 |  |
| C                                                          | -1.71868100 | 3.56479100  | -1.42285900 |  |
| C                                                          | -3.19606000 | -0.10808100 | 0.17898200  |  |
| C                                                          | -0.58221300 | -0.05894100 | -1.05337500 |  |
| C                                                          | -1.28110100 | -1.35773300 | -0.86035800 |  |
| C                                                          | -2.53249600 | -1.37761000 | -0.19485600 |  |
| C                                                          | -3.15318800 | -2.58714400 | 0.12997700  |  |
| H                                                          | -4.10850300 | -2.57998000 | 0.65446600  |  |
| C                                                          | -2.54693800 | -3.79200300 | -0.22897400 |  |
| C                                                          | -1.33455000 | -3.79623100 | -0.91445800 |  |
| C                                                          | -0.69635700 | -2.58794000 | -1.24178700 |  |
| H                                                          | -3.47584700 | 4.45816300  | -0.56177200 |  |
| H                                                          | -4.32479800 | 2.29987200  | 0.38229800  |  |
| H                                                          | -1.37903600 | 4.50271900  | -1.86132800 |  |
| H                                                          | -3.02947100 | -4.74067000 | 0.01492100  |  |
| H                                                          | -0.88803300 | -4.74427700 | -1.21325900 |  |
| O                                                          | 0.64694800  | -0.00441600 | -1.13323900 |  |
| O                                                          | -4.20772400 | -0.10420200 | 0.88691600  |  |
| O                                                          | 0.44467800  | -2.55422000 | -1.98240100 |  |
| O                                                          | 0.14163100  | 2.36321800  | -2.39795300 |  |
| C                                                          | 1.44612800  | -3.54864200 | -1.79455700 |  |
| H                                                          | 2.16368500  | -3.40781400 | -2.61636700 |  |
| H                                                          | 1.05917300  | -4.57556300 | -1.86269100 |  |
| C                                                          | 1.02671000  | 3.47999200  | -2.42817400 |  |
| C                                                          | 2.20211500  | -3.41358300 | -0.47506300 |  |
| C                                                          | 1.86205400  | 3.59784700  | -1.15765200 |  |
| C                                                          | 3.98055800  | -1.11732700 | 1.20780100  |  |
| H                                                          | 3.69537000  | -0.14454100 | 0.77904600  |  |
| H                                                          | 4.31851100  | -0.91514900 | 2.23746700  |  |
| C                                                          | 5.12430000  | -1.73317100 | 0.39743900  |  |
| H                                                          | 5.89134500  | -0.95111700 | 0.25902900  |  |
| H                                                          | 4.75802900  | -1.98118000 | -0.61477900 |  |
| C                                                          | 5.75714900  | -2.96525700 | 1.04329100  |  |
| H                                                          | 6.15032000  | -2.72954700 | 2.04697100  |  |
| H                                                          | 5.02700600  | -3.78241900 | 1.14847700  |  |



|                                                            |             |             |             |
|------------------------------------------------------------|-------------|-------------|-------------|
| H                                                          | 6.59406500  | -3.34834600 | 0.43713200  |
| C                                                          | 1.97301200  | 2.21523100  | 1.86132100  |
| H                                                          | 1.24190900  | 3.04631800  | 1.93236300  |
| H                                                          | 1.39383800  | 1.28565900  | 1.74005900  |
| C                                                          | 2.80829200  | 2.13967600  | 3.13517700  |
| H                                                          | 3.47392000  | 1.26154600  | 3.07732900  |
| H                                                          | 2.11627400  | 1.95216000  | 3.97340100  |
| C                                                          | 3.62889200  | 3.39830300  | 3.42190900  |
| H                                                          | 4.40333900  | 3.57006500  | 2.65569600  |
| H                                                          | 2.98687000  | 4.29495600  | 3.45597600  |
| H                                                          | 4.14697500  | 3.31937500  | 4.39104700  |
| O                                                          | 2.80242000  | -4.38870900 | -0.00443200 |
| O                                                          | 2.37485500  | 4.67565700  | -0.82964700 |
| N                                                          | 2.16051600  | -2.20115600 | 0.09524700  |
| N                                                          | 2.75002900  | -1.91742600 | 1.33864700  |
| N                                                          | 2.04725800  | 2.44535600  | -0.49726000 |
| N                                                          | 2.82224400  | 2.36152100  | 0.66689400  |
| H                                                          | 1.61770700  | 1.57137900  | -0.81947500 |
| H                                                          | 3.34220500  | 3.24012700  | 0.72110900  |
| H                                                          | 1.63852800  | -1.43399900 | -0.34054900 |
| H                                                          | 2.96209600  | -2.82137500 | 1.76598000  |
| H                                                          | 0.51679300  | 4.43851100  | -2.59906000 |
| H                                                          | 1.69983100  | 3.30237400  | -3.27977700 |
| Li                                                         | -5.65935300 | -0.51997900 | 1.88651800  |
| Cl                                                         | -7.75081000 | -0.63826100 | 2.14783100  |
| <b>DAAH@2Li@2Cl-Type1</b>                                  |             |             |             |
| Electronic Energy (EE)= -2536.143626 Hartree               |             |             |             |
| EE + Thermal Free Energy Correction = -2535.707656 Hartree |             |             |             |
| C                                                          | 4.81619800  | 1.59259900  | 0.08692200  |
| C                                                          | 4.00506200  | 2.56346700  | 0.67609800  |
| C                                                          | 2.63043900  | 2.56032300  | 0.42564300  |
| C                                                          | 2.05012300  | 1.56979100  | -0.40319400 |
| C                                                          | 2.89885700  | 0.63800500  | -1.04613300 |
| C                                                          | 4.27693100  | 0.64015000  | -0.77778800 |
| C                                                          | 1.78682100  | 3.61623500  | 1.05287100  |
| C                                                          | 0.57028700  | 1.46354500  | -0.46518400 |
| C                                                          | -0.22152200 | 2.68331900  | -0.16114500 |
| C                                                          | 0.35557400  | 3.69576100  | 0.64262900  |
| C                                                          | -0.40455200 | 4.78519900  | 1.07480800  |
| H                                                          | 0.06134600  | 5.54017200  | 1.70873700  |
| C                                                          | -1.74040300 | 4.89414200  | 0.68558900  |
| C                                                          | -2.31730300 | 3.93183000  | -0.14169100 |
| C                                                          | -1.56684900 | 2.82899400  | -0.57488200 |
| H                                                          | 5.88982600  | 1.58032100  | 0.28811500  |
| H                                                          | 4.42371600  | 3.32507600  | 1.33469200  |
| H                                                          | 4.93858800  | -0.09869700 | -1.23695700 |
| H                                                          | -2.33889800 | 5.74629800  | 1.01484100  |
| H                                                          | -3.35162600 | 4.04612000  | -0.46566900 |

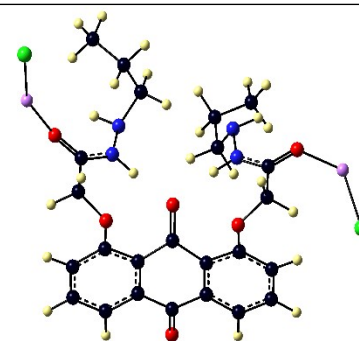

|    |             |             |             |
|----|-------------|-------------|-------------|
| O  | 0.01435300  | 0.37899000  | -0.66830500 |
| O  | 2.26346800  | 4.42078200  | 1.84615600  |
| O  | -2.06686000 | 1.91392300  | -1.45659400 |
| O  | 2.33509700  | -0.20124100 | -1.96233300 |
| C  | -3.42628100 | 1.51599700  | -1.37659700 |
| H  | -3.65252400 | 0.99652100  | -2.32004500 |
| H  | -4.12626500 | 2.35956800  | -1.28652000 |
| C  | 2.85651800  | -1.51714600 | -2.10963400 |
| C  | -3.70262400 | 0.54760300  | -0.23752000 |
| C  | 2.57845700  | -2.37081600 | -0.88115100 |
| C  | -2.56361400 | -2.32215300 | 1.01959900  |
| H  | -1.57628000 | -2.40739600 | 0.54146800  |
| H  | -2.50363600 | -2.89586300 | 1.95856400  |
| C  | -3.65497700 | -2.90499700 | 0.11753400  |
| H  | -3.29553400 | -3.87348800 | -0.27123900 |
| H  | -3.78187400 | -2.25469100 | -0.76587900 |
| C  | -4.99638200 | -3.10077500 | 0.82455100  |
| H  | -4.92866400 | -3.88488900 | 1.59707200  |
| H  | -5.32482600 | -2.17378400 | 1.32349400  |
| H  | -5.78812600 | -3.37366400 | 0.11019900  |
| C  | 0.97059300  | -1.87687300 | 2.09781600  |
| H  | 1.93007300  | -1.34714000 | 2.26379600  |
| H  | 0.21200800  | -1.11088900 | 1.87286600  |
| C  | 0.57153200  | -2.64238700 | 3.35395300  |
| H  | -0.39364700 | -3.14720500 | 3.17745100  |
| H  | 0.39346800  | -1.89710100 | 4.14723500  |
| C  | 1.61416800  | -3.65529900 | 3.82960600  |
| H  | 1.76250700  | -4.47163200 | 3.10299400  |
| H  | 2.59234500  | -3.17255500 | 3.99426900  |
| H  | 1.30567600  | -4.12170900 | 4.77884200  |
| O  | -4.88275700 | 0.34192800  | 0.12606400  |
| O  | 3.32734400  | -3.33043800 | -0.57029800 |
| N  | -2.65338400 | -0.04000200 | 0.32082100  |
| N  | -2.73617200 | -0.91213700 | 1.41563100  |
| N  | 1.48110300  | -2.06726500 | -0.20310800 |
| N  | 1.05481200  | -2.76838400 | 0.92936000  |
| H  | 0.89447300  | -1.26861200 | -0.48439000 |
| H  | 1.74664500  | -3.50469600 | 1.08602100  |
| H  | -1.70384000 | 0.13939900  | -0.03587300 |
| H  | -3.65635700 | -0.76994400 | 1.83652000  |
| H  | 3.93668500  | -1.53660500 | -2.32198900 |
| H  | 2.33194600  | -1.95443700 | -2.97212500 |
| Li | -6.42838800 | -0.27983800 | -0.56989700 |
| Li | 5.12855300  | -3.50683700 | -0.83524500 |
| Cl | -7.36470500 | -1.69608900 | -1.84935600 |
| Cl | 6.51942900  | -2.16300400 | -1.78556800 |

**DAAH@2Li@2Cl-Type2**

Electronic Energy (EE)= -2536.173073 Hartree

EE + Thermal Free Energy Correction = -2535.729381 Hartree

|   |             |             |             |
|---|-------------|-------------|-------------|
| C | 5.05435000  | 0.08566800  | -1.44968200 |
| C | 4.76399400  | -1.06923700 | -0.71957700 |
| C | 3.59477700  | -1.13269100 | 0.04120400  |
| C | 2.72599000  | -0.02082800 | 0.12513000  |
| C | 3.00647800  | 1.11476400  | -0.66519200 |
| C | 4.16751000  | 1.16224800  | -1.44346500 |
| C | 3.21702000  | -2.41538000 | 0.69418300  |
| C | 1.56258900  | -0.07764500 | 1.03494700  |
| C | 0.98735000  | -1.40082300 | 1.33674100  |
| C | 1.80150800  | -2.54905400 | 1.15495600  |
| C | 1.29789300  | -3.83046700 | 1.36827100  |
| H | 1.95367300  | -4.69116200 | 1.23551700  |
| C | -0.04651400 | -3.99103700 | 1.70752300  |
| C | -0.87151100 | -2.88341100 | 1.88448600  |
| C | -0.35989600 | -1.58523200 | 1.74339000  |
| H | 5.96658300  | 0.14199900  | -2.04701800 |
| H | 5.42482000  | -1.93645800 | -0.75051700 |
| H | 4.36793300  | 2.05366100  | -2.04001600 |
| H | -0.46592600 | -4.99159800 | 1.83020300  |
| H | -1.92121100 | -3.04040200 | 2.12485800  |
| O | 1.10083800  | 0.97154900  | 1.51493300  |
| O | 4.00115800  | -3.35229300 | 0.77028800  |
| O | -1.14631900 | -0.48354600 | 1.95021400  |
| O | 2.11597700  | 2.16741500  | -0.70336600 |
| C | -2.49094200 | -0.61408900 | 2.44142300  |
| H | -2.69024500 | 0.29302900  | 3.03289900  |
| H | -2.59279900 | -1.46279400 | 3.12894700  |
| C | 1.50097900  | 2.43454500  | -1.98103300 |
| C | -3.58060800 | -0.67258700 | 1.38388700  |
| C | 0.65629100  | 1.25365000  | -2.46804700 |
| C | -4.31637200 | 0.77321800  | -1.61388900 |
| H | -3.39778500 | 0.90823000  | -2.20707800 |
| H | -5.13885200 | 0.64795100  | -2.33705500 |
| C | -4.55262400 | 2.01956000  | -0.75613700 |
| H | -4.55802200 | 2.88628400  | -1.44029800 |
| H | -3.68728500 | 2.17194900  | -0.08847600 |
| C | -5.85000300 | 1.99053800  | 0.05074600  |
| H | -6.72623300 | 1.86256500  | -0.60788700 |
| H | -5.85287100 | 1.16394300  | 0.77755000  |
| H | -5.98828500 | 2.92783700  | 0.61364400  |
| C | -0.20626400 | -1.65112500 | -1.97564400 |
| H | 0.34343700  | -1.61624600 | -2.93338800 |
| H | 0.54085700  | -1.73051000 | -1.17643900 |
| C | -1.12803500 | -2.86632500 | -1.94598900 |
| H | -1.61805800 | -2.92230700 | -0.95919500 |

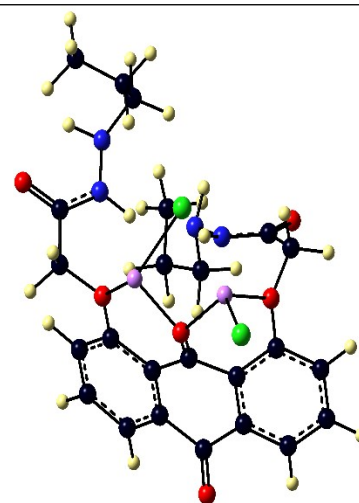

|                                                                                                             |             |             |             |
|-------------------------------------------------------------------------------------------------------------|-------------|-------------|-------------|
| H                                                                                                           | -0.48796500 | -3.76120400 | -2.02720700 |
| C                                                                                                           | -2.18014400 | -2.88115300 | -3.05626300 |
| H                                                                                                           | -2.90301000 | -2.05787200 | -2.93965900 |
| H                                                                                                           | -1.71184900 | -2.78651400 | -4.05078000 |
| H                                                                                                           | -2.75577500 | -3.82072400 | -3.04431000 |
| O                                                                                                           | -4.74723600 | -0.82275200 | 1.77848200  |
| O                                                                                                           | 0.73093300  | 0.84076100  | -3.62245900 |
| N                                                                                                           | -3.24007400 | -0.50690400 | 0.10245100  |
| N                                                                                                           | -4.21487100 | -0.51939600 | -0.91271100 |
| N                                                                                                           | -0.14085200 | 0.71055000  | -1.51852600 |
| N                                                                                                           | -0.95869200 | -0.40172600 | -1.74999700 |
| H                                                                                                           | -0.35641200 | 1.25899800  | -0.68246300 |
| H                                                                                                           | -1.54699700 | -0.20451700 | -2.56413400 |
| H                                                                                                           | -2.27079400 | -0.49629400 | -0.25967300 |
| H                                                                                                           | -5.09832200 | -0.73701100 | -0.44713200 |
| H                                                                                                           | 2.25197300  | 2.65991300  | -2.75015100 |
| H                                                                                                           | 0.86353700  | 3.31576500  | -1.82247700 |
| Li                                                                                                          | -0.65083800 | 1.38120700  | 2.06897800  |
| Li                                                                                                          | 1.40199500  | 2.91069700  | 0.99948500  |
| Cl                                                                                                          | -0.97620300 | 3.11489400  | 0.69610100  |
| Cl                                                                                                          | 2.66550400  | 4.20171700  | 2.18162100  |
| <b>DAAH@2Li@2Cl@2H<sub>2</sub>O-Type2-model</b><br><b>[syn(arms)-syn(LiCl)]</b>                             |             |             |             |
| Electronic Energy (EE) = -2688.960957 Hartree<br>EE + Thermal Free Energy Correction = -2688.478348 Hartree |             |             |             |
| C                                                                                                           | -3.25764600 | 2.89383800  | 1.50975400  |
| C                                                                                                           | -2.37345500 | 3.74425600  | 0.84321000  |
| C                                                                                                           | -1.11504000 | 3.27293800  | 0.47232600  |
| C                                                                                                           | -0.69900800 | 1.95902100  | 0.80589900  |
| C                                                                                                           | -1.61117400 | 1.11099000  | 1.48971500  |
| C                                                                                                           | -2.89124500 | 1.58589700  | 1.81865400  |
| C                                                                                                           | -0.22509100 | 4.17549700  | -0.31383600 |
| C                                                                                                           | 0.65985700  | 1.52138800  | 0.43822300  |
| C                                                                                                           | 1.34172200  | 2.23344100  | -0.66257100 |
| C                                                                                                           | 0.94335400  | 3.55211300  | -0.99424300 |
| C                                                                                                           | 1.61024700  | 4.27499500  | -1.98333300 |
| H                                                                                                           | 1.28980000  | 5.29394200  | -2.20266100 |
| C                                                                                                           | 2.66454200  | 3.68356900  | -2.68502100 |
| C                                                                                                           | 3.05309700  | 2.37694100  | -2.40054300 |
| C                                                                                                           | 2.40167800  | 1.64905800  | -1.39514100 |
| H                                                                                                           | -4.25238300 | 3.24775900  | 1.78841400  |
| H                                                                                                           | -2.65644300 | 4.76578600  | 0.58824800  |
| H                                                                                                           | -3.61170300 | 0.93805200  | 2.31417800  |
| H                                                                                                           | 3.19021500  | 4.24550200  | -3.45980700 |
| H                                                                                                           | 3.87909700  | 1.91489900  | -2.94325000 |
| O                                                                                                           | 1.22511500  | 0.58295500  | 1.03727600  |
| O                                                                                                           | -0.48540500 | 5.36436000  | -0.45155800 |
| O                                                                                                           | 2.80175700  | 0.38083600  | -1.08938800 |

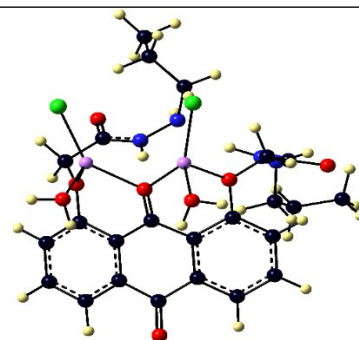

|    |             |             |             |
|----|-------------|-------------|-------------|
| O  | -1.20849200 | -0.15295200 | 1.78919700  |
| C  | 2.97669700  | -0.59943000 | -2.12171900 |
| H  | 3.92838900  | -1.11219100 | -1.92528800 |
| H  | 3.00235100  | -0.13801700 | -3.11810700 |
| C  | -2.17810900 | -1.14752600 | 2.16573300  |
| C  | 1.89159900  | -1.66608600 | -2.12291900 |
| C  | -3.20306100 | -1.39576000 | 1.06311600  |
| C  | 0.21734200  | -3.56601400 | 0.04199000  |
| H  | 0.31769800  | -3.03629600 | 1.00238700  |
| H  | -0.69911200 | -4.17648800 | 0.10414400  |
| C  | 1.43957400  | -4.46101900 | -0.17065200 |
| H  | 1.55837600  | -5.05750900 | 0.75126500  |
| H  | 2.34378000  | -3.82982200 | -0.23100000 |
| C  | 1.33952400  | -5.39209900 | -1.37727400 |
| H  | 0.45298700  | -6.04527600 | -1.30497100 |
| H  | 1.26724400  | -4.82343400 | -2.31664000 |
| H  | 2.22720000  | -6.04101200 | -1.45420100 |
| C  | -3.86576600 | -0.48443600 | -1.89532500 |
| H  | -4.28484300 | 0.21818400  | -1.14706500 |
| H  | -2.93019400 | -0.03540800 | -2.26505500 |
| C  | -4.84910400 | -0.65844700 | -3.04790600 |
| H  | -4.40889100 | -1.33999100 | -3.79680100 |
| H  | -4.95934600 | 0.32148500  | -3.54220200 |
| C  | -6.22686100 | -1.17071800 | -2.62311200 |
| H  | -6.18253900 | -2.19676800 | -2.22128800 |
| H  | -6.66724200 | -0.52553500 | -1.84406800 |
| H  | -6.92296200 | -1.18965100 | -3.47696700 |
| O  | 1.89402600  | -2.51269100 | -3.02222900 |
| O  | -4.41528300 | -1.40779400 | 1.30847900  |
| N  | 0.97751200  | -1.61479700 | -1.14076300 |
| N  | -0.05866100 | -2.54817000 | -0.99503000 |
| N  | -2.68958000 | -1.59466300 | -0.16263000 |
| N  | -3.52241500 | -1.77741800 | -1.27743500 |
| H  | -1.68164000 | -1.76642000 | -0.33931000 |
| H  | -4.37963600 | -2.21010200 | -0.92691000 |
| H  | 1.02238800  | -0.90544200 | -0.41627200 |
| H  | -0.19424600 | -2.98567400 | -1.90932100 |
| H  | -2.70407600 | -0.86072000 | 3.08661200  |
| H  | -1.57866300 | -2.04533400 | 2.37243000  |
| Li | 3.18492300  | -0.01892400 | 0.86085000  |
| Li | 0.60107100  | -0.24842700 | 2.71984500  |
| Cl | 4.33625100  | -1.88612800 | 0.70062500  |
| Cl | 0.87055400  | -2.27675600 | 3.48620700  |
| O  | 0.49600500  | 1.29613900  | 3.88655900  |
| H  | -0.35720200 | 1.33231200  | 4.34820500  |
| H  | 0.54001500  | 2.14541400  | 3.41914900  |
| O  | 3.94418400  | 1.58688400  | 1.58699500  |
| H  | 3.48282300  | 2.40339300  | 1.33696400  |
| H  | 4.86981700  | 1.75444700  | 1.34916400  |

**DAAH@2Li@2Cl@2H<sub>2</sub>O-Type2-model**  
**[syn(arms)-anti(LiCl)]**

Electronic Energy (EE) = -2688.981231 Hartree

EE + Thermal Free Energy Correction = -2688.494198 Hartree

|   |             |             |             |
|---|-------------|-------------|-------------|
| C | 0.60697000  | -4.59347800 | -0.29413600 |
| C | 1.86683600  | -4.18106300 | -0.72517600 |
| C | 2.25112400  | -2.85138600 | -0.55766200 |
| C | 1.39842500  | -1.90784400 | 0.07498300  |
| C | 0.13200700  | -2.36124300 | 0.53862400  |
| C | -0.25517900 | -3.69502000 | 0.32689600  |
| C | 3.59788600  | -2.45591000 | -1.05995200 |
| C | 1.86531000  | -0.51617500 | 0.24835900  |
| C | 3.02749500  | -0.05561600 | -0.55414100 |
| C | 3.90649100  | -1.00439400 | -1.13238000 |
| C | 5.05717500  | -0.60357100 | -1.81434600 |
| H | 5.71497300  | -1.36610200 | -2.23256300 |
| C | 5.34502000  | 0.75416500  | -1.96088500 |
| C | 4.47504900  | 1.70708100  | -1.43736500 |
| C | 3.32487800  | 1.31304200  | -0.74461400 |
| H | 0.28630100  | -5.62723500 | -0.43810100 |
| H | 2.55561400  | -4.87797800 | -1.20248100 |
| H | -1.23350500 | -4.04751000 | 0.64759100  |
| H | 6.24634300  | 1.07310500  | -2.48818600 |
| H | 4.67962500  | 2.77296900  | -1.55131600 |
| O | 4.40045700  | -3.29662000 | -1.44790700 |
| O | 2.49379400  | 2.29057000  | -0.24274500 |
| O | -0.69121500 | -1.48020500 | 1.17330200  |
| C | 1.83001700  | 3.12742800  | -1.21162200 |
| H | 2.53377300  | 3.48917300  | -1.97272800 |
| H | 1.42344900  | 3.97457400  | -0.64248800 |
| C | -2.00009200 | -1.90283700 | 1.58297900  |
| C | 0.68725900  | 2.40649000  | -1.92808500 |
| C | -2.97847600 | -2.15990300 | 0.44208500  |
| C | -2.39319400 | 1.95248000  | -1.88311000 |
| H | -2.06568500 | 2.82146500  | -2.48350000 |
| H | -3.11239600 | 1.39100100  | -2.49817500 |
| C | -3.05119700 | 2.41859900  | -0.58848200 |
| H | -2.30865400 | 2.96211500  | 0.02032400  |
| H | -3.34325900 | 1.53401800  | 0.00158900  |
| C | -4.26546300 | 3.30787000  | -0.84417200 |
| H | -3.98583800 | 4.21843400  | -1.40044600 |
| H | -5.03108200 | 2.77996300  | -1.43738000 |
| H | -4.73543300 | 3.62448000  | 0.10048000  |
| O | 0.55475500  | 2.47698800  | -3.15098900 |
| O | -3.78873700 | -3.08921500 | 0.53277400  |
| N | -0.14047600 | 1.69964600  | -1.12974800 |
| N | -1.26731100 | 1.03119500  | -1.62896100 |
| N | -2.91786900 | -1.31923500 | -0.60322900 |

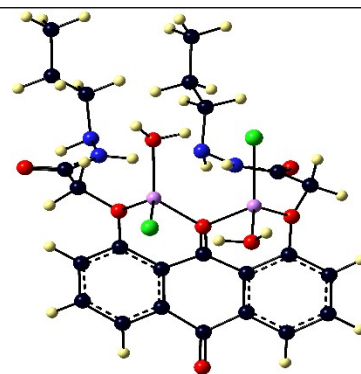

|                                                                                                             |             |             |             |
|-------------------------------------------------------------------------------------------------------------|-------------|-------------|-------------|
| N                                                                                                           | -3.76977300 | -1.47326200 | -1.71147000 |
| H                                                                                                           | -0.07498900 | 1.78294400  | -0.11765600 |
| H                                                                                                           | -0.98255400 | 0.60198400  | -2.51147000 |
| H                                                                                                           | -2.39411800 | -1.07062400 | 2.17988100  |
| H                                                                                                           | -1.95017500 | -2.79766500 | 2.21766900  |
| Li                                                                                                          | 1.91745700  | 2.08631200  | 1.63372400  |
| Li                                                                                                          | -0.06069800 | -0.03096600 | 2.39807400  |
| C                                                                                                           | -4.99631000 | -0.66106100 | -1.62745800 |
| H                                                                                                           | -5.59086000 | -0.93487300 | -2.51442100 |
| H                                                                                                           | -4.72028700 | 0.39572500  | -1.75700700 |
| C                                                                                                           | -5.85172900 | -0.80163900 | -0.36668800 |
| H                                                                                                           | -6.15394300 | -1.85494900 | -0.24364800 |
| H                                                                                                           | -5.24319100 | -0.54508800 | 0.51771100  |
| C                                                                                                           | -7.07949200 | 0.10650300  | -0.41634100 |
| H                                                                                                           | -7.72245400 | -0.13236400 | -1.28042100 |
| H                                                                                                           | -7.69144800 | 0.00537200  | 0.49415000  |
| H                                                                                                           | -6.78477200 | 1.16615500  | -0.50471000 |
| H                                                                                                           | -2.20670000 | -0.57734600 | -0.69062600 |
| H                                                                                                           | -4.03194300 | -2.46112400 | -1.73009700 |
| O                                                                                                           | 1.32919400  | 0.25149200  | 1.06504500  |
| Cl                                                                                                          | 0.17369600  | 3.50728100  | 1.79222100  |
| Cl                                                                                                          | 1.05861200  | -0.21938800 | 4.31328400  |
| O                                                                                                           | 3.12485600  | 1.65800000  | 3.03345600  |
| H                                                                                                           | 3.31844600  | 2.37573900  | 3.65607000  |
| O                                                                                                           | -1.61203500 | 1.11620900  | 2.31234700  |
| H                                                                                                           | -2.11263900 | 1.19455100  | 3.13902300  |
| H                                                                                                           | -1.19733500 | 2.00654200  | 2.18404800  |
| H                                                                                                           | 2.56983100  | 1.02108900  | 3.55762800  |
| <b>DAAH@2Li@2Cl@2H<sub>2</sub>O-Type2-mode3</b><br><b>[anti(arms)-anti(LiCl)]</b>                           |             |             |             |
| Electronic Energy (EE) = -2688.986089 Hartree<br>EE + Thermal Free Energy Correction = -2688.498299 Hartree |             |             |             |
| C                                                                                                           | 5.33830600  | -0.23475100 | -1.72747100 |
| C                                                                                                           | 4.79283300  | 1.04910200  | -1.69709100 |
| C                                                                                                           | 3.45658400  | 1.23262400  | -1.33825300 |
| C                                                                                                           | 2.62535200  | 0.13239300  | -1.00519000 |
| C                                                                                                           | 3.20391600  | -1.16094200 | -1.04258100 |
| C                                                                                                           | 4.54672700  | -1.33129900 | -1.40135800 |
| C                                                                                                           | 2.92946400  | 2.62325600  | -1.30822900 |
| C                                                                                                           | 1.20297400  | 0.36300500  | -0.64816600 |
| C                                                                                                           | 0.74307600  | 1.74442300  | -0.38425500 |
| C                                                                                                           | 1.56520600  | 2.84043200  | -0.75227000 |
| C                                                                                                           | 1.13893800  | 4.15792400  | -0.58237300 |
| H                                                                                                           | 1.79855100  | 4.97109800  | -0.88496700 |
| C                                                                                                           | -0.11611800 | 4.41653500  | -0.03196500 |
| C                                                                                                           | -0.93405900 | 3.36455700  | 0.36825700  |
| C                                                                                                           | -0.51319400 | 2.03620500  | 0.21301200  |
| H                                                                                                           | 6.38104500  | -0.38479200 | -2.01430200 |

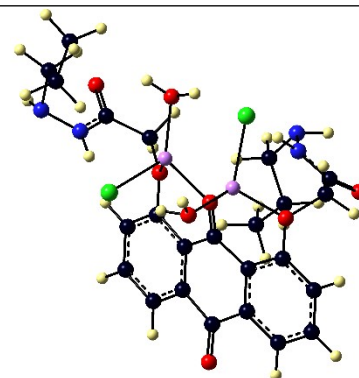

|    |             |             |             |
|----|-------------|-------------|-------------|
| H  | 5.39516600  | 1.92110400  | -1.95279100 |
| H  | 4.95861400  | -2.34058400 | -1.43638600 |
| H  | -0.46338300 | 5.44444500  | 0.09024000  |
| H  | -1.91504900 | 3.57496600  | 0.79321500  |
| O  | 3.61257500  | 3.56606200  | -1.69179600 |
| O  | -1.29638300 | 1.00991600  | 0.65106200  |
| O  | 2.45353400  | -2.27833300 | -0.75544900 |
| C  | -2.18845700 | 1.19020500  | 1.75930700  |
| H  | -1.87840200 | 2.03429800  | 2.39069500  |
| H  | -2.11640100 | 0.27225700  | 2.35874400  |
| C  | 2.91839100  | -3.14477000 | 0.30472000  |
| C  | -3.65434500 | 1.34275900  | 1.39192900  |
| C  | 2.76464200  | -2.46064700 | 1.66397500  |
| C  | -5.97139300 | -0.00755400 | -0.14538200 |
| H  | -5.67217500 | -0.47333100 | 0.81333700  |
| H  | -7.05878700 | 0.16276300  | -0.08933100 |
| C  | -5.65236900 | -0.94845900 | -1.30336500 |
| H  | -4.56476100 | -0.95149400 | -1.48519000 |
| H  | -6.10799300 | -0.54639200 | -2.22514900 |
| C  | -6.13915700 | -2.37261900 | -1.04499900 |
| H  | -5.64458600 | -2.80624600 | -0.15826600 |
| H  | -7.22707600 | -2.40405300 | -0.86344600 |
| H  | -5.92343100 | -3.03291800 | -1.90022000 |
| O  | -4.47472200 | 1.47339000  | 2.30439200  |
| O  | 3.74516500  | -2.19590800 | 2.36681300  |
| N  | -3.99568400 | 1.30815400  | 0.08860300  |
| N  | -5.34576700 | 1.31883800  | -0.30400800 |
| N  | 1.49388800  | -2.18325200 | 2.00938100  |
| N  | 1.14935400  | -1.57783300 | 3.22617200  |
| H  | -3.31199000 | 1.16621500  | -0.66025000 |
| H  | -5.81638700 | 1.97520400  | 0.32058400  |
| H  | 3.97275300  | -3.41473800 | 0.16742300  |
| H  | 2.29091200  | -4.04300600 | 0.24110400  |
| Li | -1.51591900 | -0.61294100 | -0.43418800 |
| Li | 0.59174600  | -2.39813100 | -1.37733800 |
| C  | 1.02370900  | -0.11507000 | 3.13138900  |
| H  | 0.60793000  | 0.21958000  | 4.09620200  |
| H  | 0.26415400  | 0.10230000  | 2.36718300  |
| C  | 2.30179800  | 0.66989000  | 2.82506200  |
| H  | 3.08985300  | 0.36369400  | 3.53444300  |
| H  | 2.66900200  | 0.39729700  | 1.82201500  |
| C  | 2.08156700  | 2.17977200  | 2.90662600  |
| H  | 1.81674600  | 2.48872200  | 3.93196100  |
| H  | 2.98617300  | 2.73508600  | 2.61199300  |
| H  | 1.26370500  | 2.50473100  | 2.24445900  |
| H  | 0.72118000  | -2.57339300 | 1.45778200  |
| H  | 1.89181600  | -1.81031300 | 3.89006800  |
| O  | 0.40520400  | -0.58781800 | -0.61188500 |
| Cl | -2.19692700 | 0.08261300  | -2.47349200 |
| Cl | -0.51736200 | -3.83842900 | -0.04442000 |



|   |             |             |             |
|---|-------------|-------------|-------------|
| O | -2.58940100 | -1.71427100 | 0.70161100  |
| H | -3.49663400 | -1.85632500 | 0.38909000  |
| O | 0.05153700  | -1.98478400 | -3.15305600 |
| H | -0.36756600 | -2.70644300 | -3.64730900 |
| H | -0.65819300 | -1.30038900 | -3.07474300 |
| H | -2.12830800 | -2.57643800 | 0.56835000  |

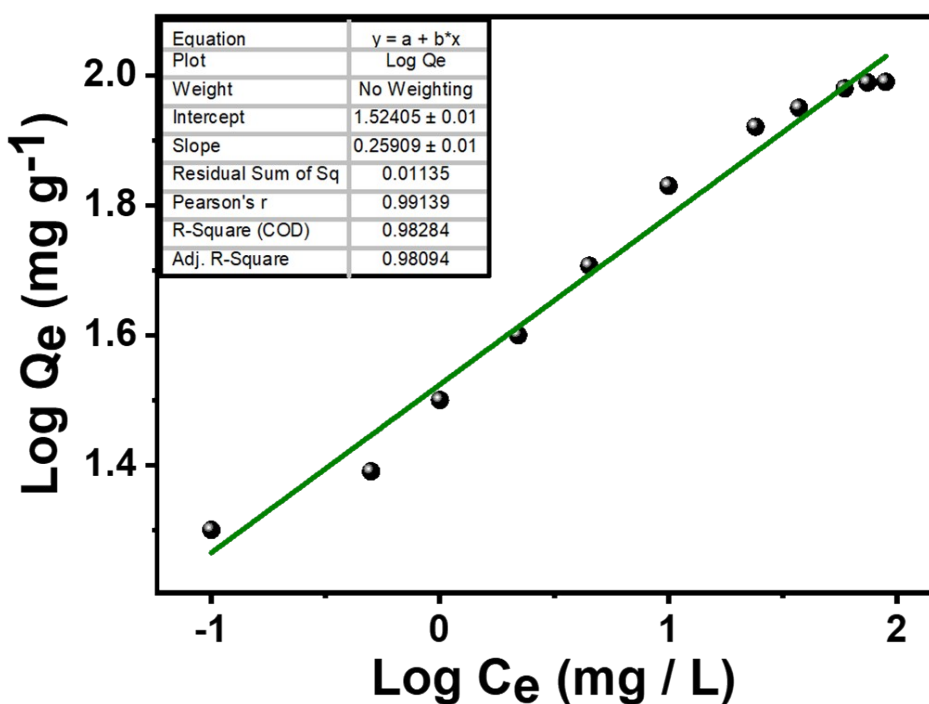

Fig. S14 The Freundlich isotherm plot of the material towards the Li<sup>+</sup> ions.

Table S3. Langmuir and Freundlich adsorption parameters for Li<sup>+</sup> at 25 °C.

| Analytes        | Experimental | Langmuir Linear Isotherm             |                                     |                | Freundlich adsorption Isotherm |      |                |
|-----------------|--------------|--------------------------------------|-------------------------------------|----------------|--------------------------------|------|----------------|
|                 |              | q <sub>m</sub> (mg g <sup>-1</sup> ) | K <sub>L</sub> (L g <sup>-1</sup> ) | R <sup>2</sup> | K <sub>f</sub>                 | n    | R <sup>2</sup> |
| Li <sup>+</sup> | 97.8         | 100.80                               | 0.33                                | 0.9982         | 33.42                          | 3.86 | 0.98284        |

**Table S4.** The competitive adsorption results from ICP-MS analysis.

| S. No. | Metal ions       | Initial Concentration ( $C_i$ ) | Final Concentration ( $C_f$ ) | % Extraction Efficiency |
|--------|------------------|---------------------------------|-------------------------------|-------------------------|
| 1      | $\text{Ca}^{2+}$ | 31.23                           | 30.05                         | 3.78                    |
| 2      | $\text{Mg}^{2+}$ | 30.35                           | 29.95                         | Negligible              |
| 3      | $\text{Sr}^{2+}$ | 28.64                           | 28.45                         | Negligible              |
| 4      | $\text{Li}^+$    | 29.75                           | 2.27                          | 92.34                   |
| 5      | $\text{Na}^+$    | 32.68                           | 32.08                         | Negligible              |
| 6      | $\text{K}^+$     | 31.49                           | 31.16                         | Negligible              |
| 7      | $\text{Cs}^+$    | 29.86                           | 29.34                         | Negligible              |
| 8      | $\text{Co}^{2+}$ | 30.27                           | 29.98                         | Negligible              |
| 9      | $\text{Mn}^{2+}$ | 30.38                           | 30.01                         | Negligible              |
| 10     | $\text{Ni}^{2+}$ | 29.17                           | 29.06                         | Negligible              |
| 11     | $\text{Cu}^{2+}$ | 29.73                           | 29.26                         | Negligible              |
| 12     | $\text{Fe}^{2+}$ | 29.54                           | 29.02                         | Negligible              |
| 13     | $\text{Zn}^{2+}$ | 29.33                           | 28.94                         | Negligible              |
| 14     | $\text{Cd}^{2+}$ | 30.41                           | 30.19                         | Negligible              |
| 15     | $\text{Hg}^{2+}$ | 29.15                           | 28.96                         | Negligible              |
| 16     | $\text{Cr}^{3+}$ | 28.98                           | 28.84                         | Negligible              |

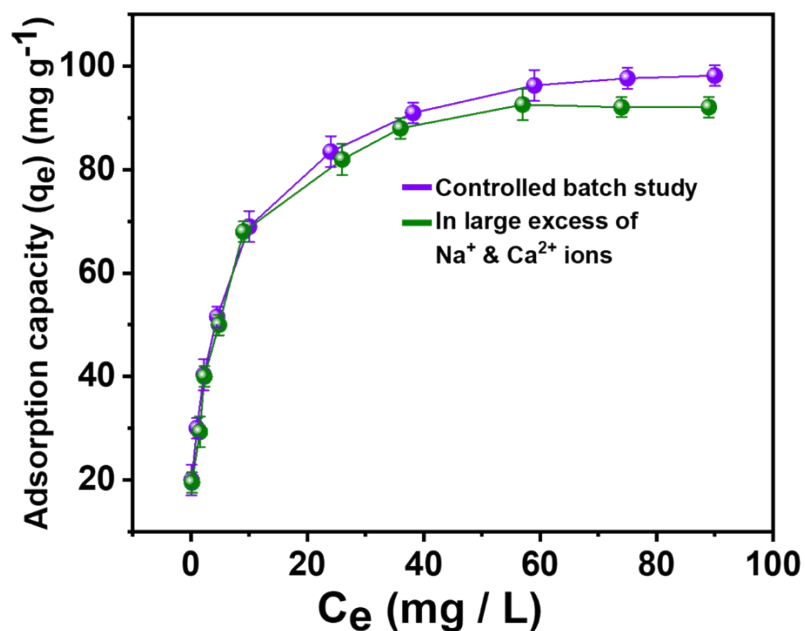

**Fig. S15** The equilibrium adsorption capacity plot ( $q_e$ ) (batch study) towards  $\text{Li}^+$  ions in controlled mode and in the presence of large excess (1000 times) of  $\text{Na}^+$  and  $\text{Ca}^{2+}$  ions.

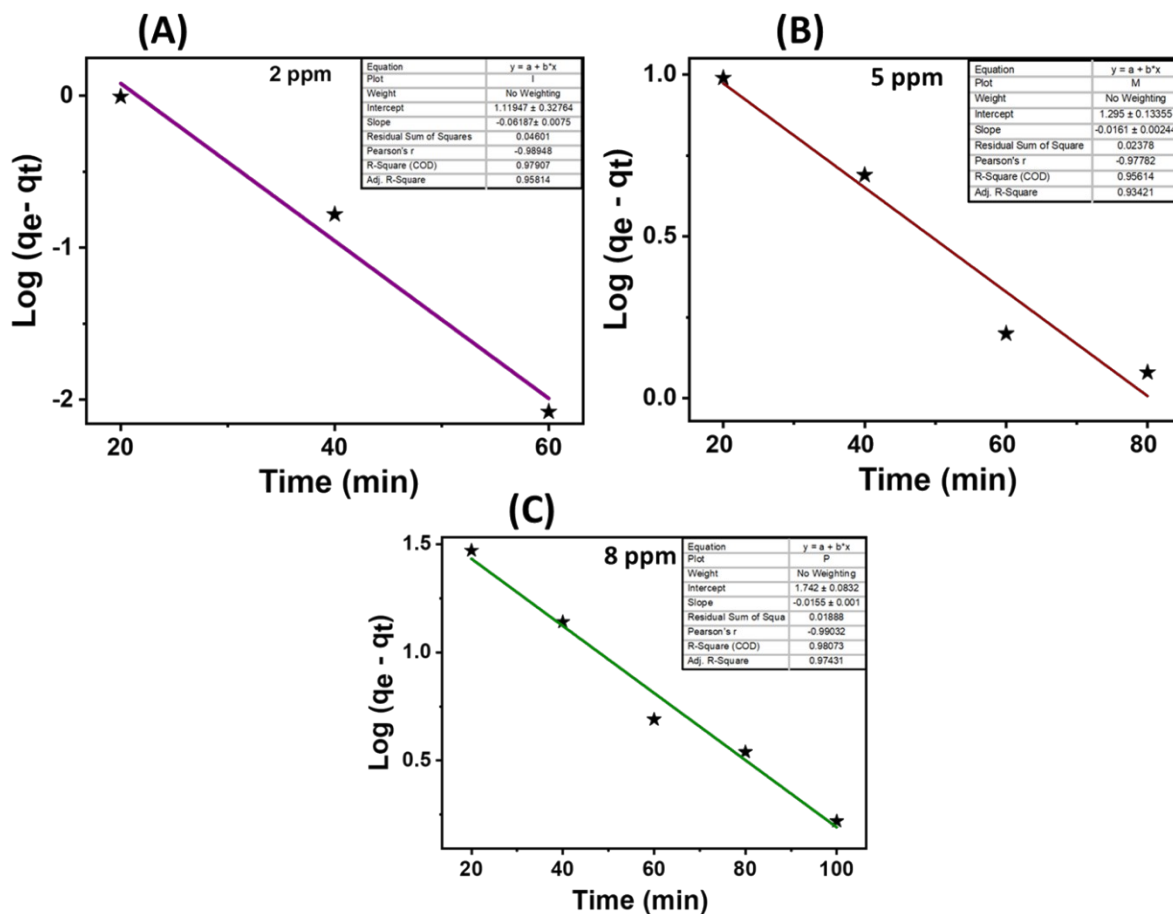

**Fig. S16 (A-C)** The Pseudo first-order rate kinetics model of the material towards specific concentrations ( $\text{Li}^+$ ).

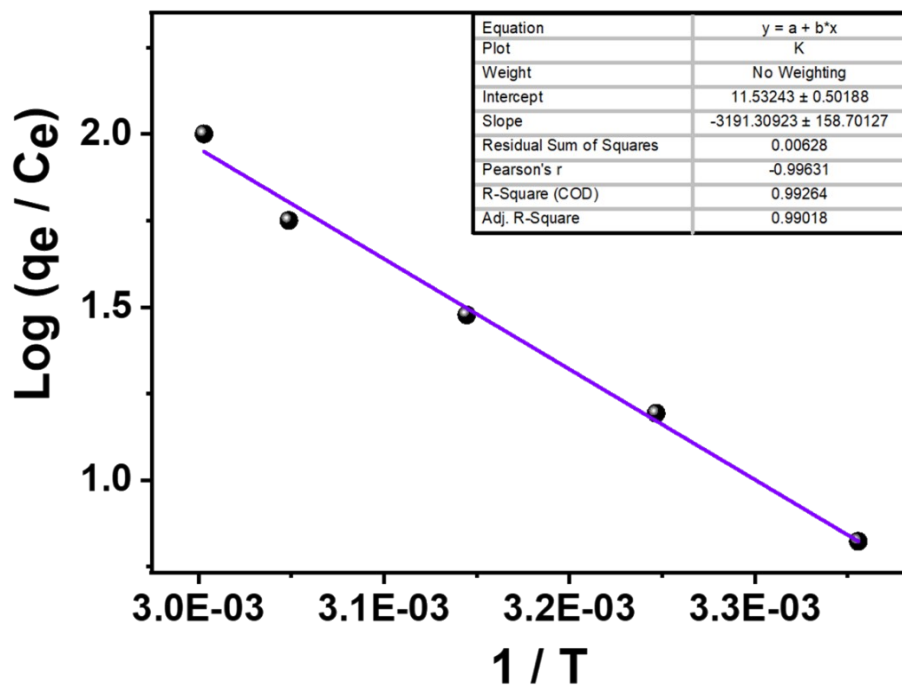

Fig. S17 The Gibbs energy plot of the material towards the  $\text{Li}^+$  ions.

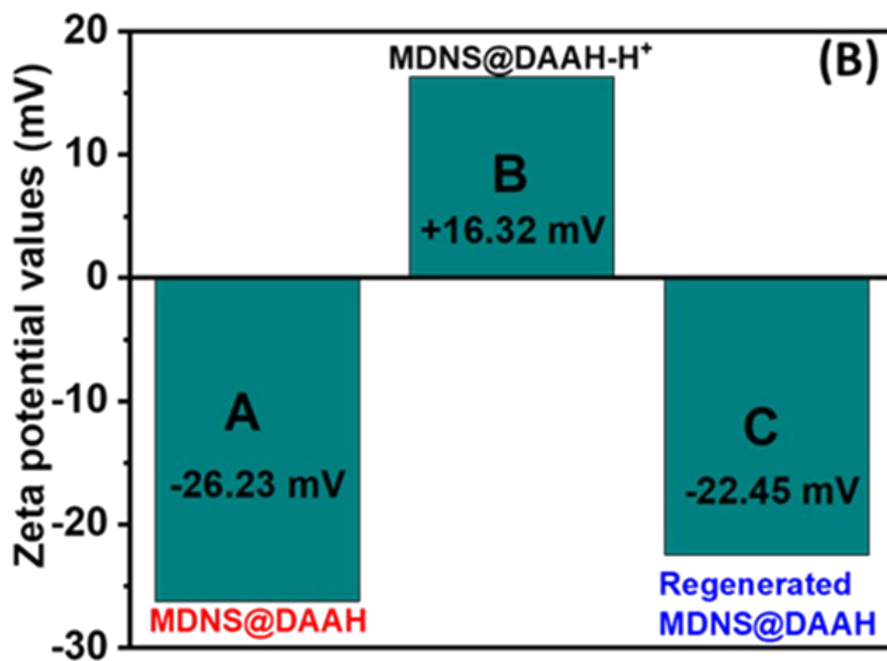

Fig. S18 Zeta potential measurement during acid-base treatment.

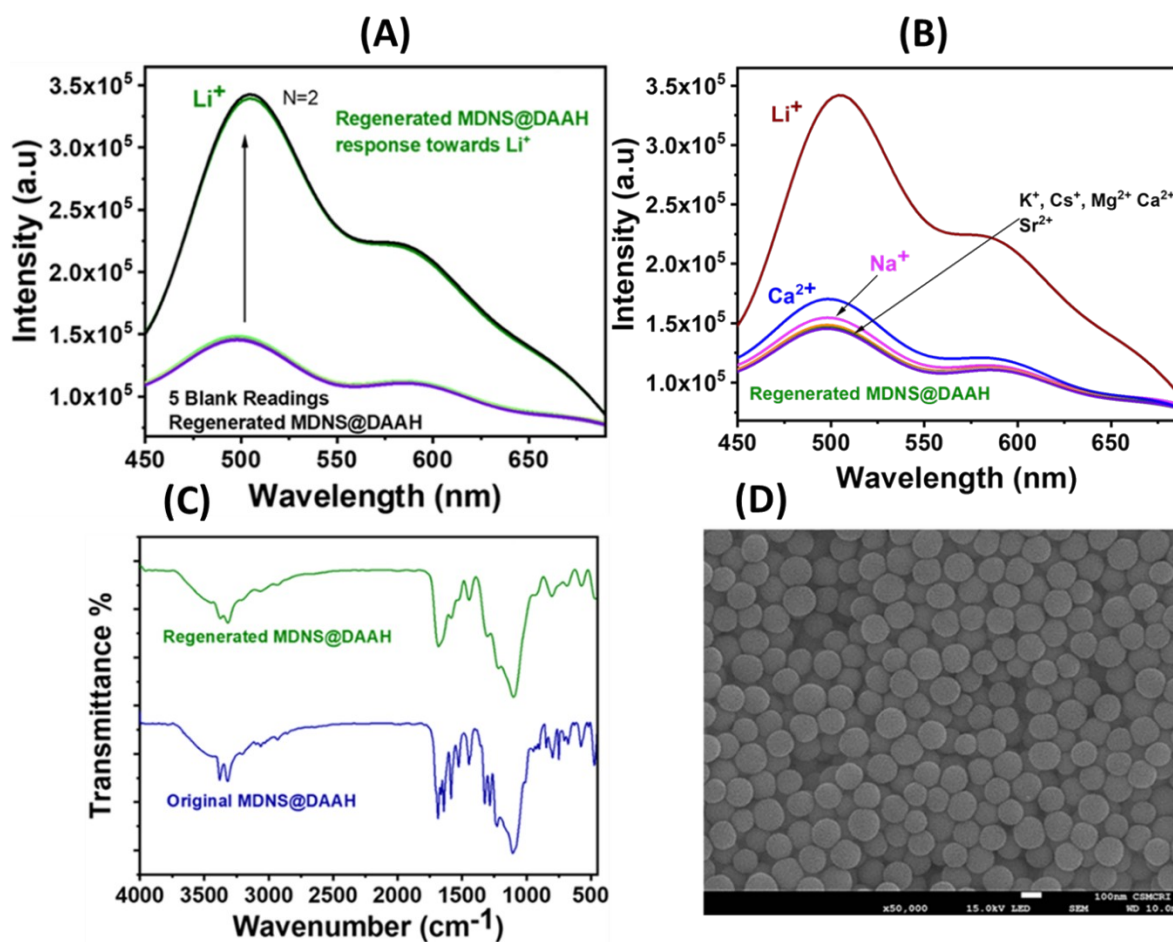

**Fig. S19** (A) The optical response (Fluorescence) & (B) selectivity studies (C) functionality FT-IR, and (D) SEM morphology of the regenerated material MDNS@DAAH.

**Table S5.** The comparison of sensing and adsorption parameters with literature reports.

| S.No. | Material Type                             | Sensing Studies/Type | L.O.D.             | Adsorption Capacity ( $Q_e$ ) | Adsorption from seawater | Ref  |
|-------|-------------------------------------------|----------------------|--------------------|-------------------------------|--------------------------|------|
| 1     | Ionophore                                 | Yes/ Turn off        | –                  | –                             | –                        | [6]  |
| 2     | Aza crown substituted naphthalene diimide | Yes/ Turn off        | 5.0 $\mu\text{M}$  | –                             | –                        | [11] |
| 3     | Aza crown naphthalene derivative          | Yes/ excimer         | 21.0 $\mu\text{M}$ | –                             | –                        | [10] |
| 4     | Spiropyran crown ether isomerisation      | Yes/ Turn On         | 4.6 $\mu\text{M}$  | –                             | –                        | [9]  |

|    |                                                            |               |              |             |                  |           |
|----|------------------------------------------------------------|---------------|--------------|-------------|------------------|-----------|
| 5  | pH independent fluorescent chemosensor                     | Yes/ Turn off | 0.6 mM       | –           | –                | [12]      |
| 6  | Fluorescent copolymer aggregate sensor                     | Yes/ Turn off | 0.45 $\mu$ M | –           | –                | [13]      |
| 7  | Ruthenium based metallacrown complex                       | Yes/ Turn On  | -            | –           | –                | [14]      |
| 8  | Aminoethyl benzo crown functionalized polymer brushes      | No/           | -            | 4.22 mg / g | –                | [25]      |
| 9  | Allyloxy methylol crown ether functionalized polymer brush | No/           | -            | 4.43 mg / g | –                | [26]      |
| 10 | HMO immobilised alpha- alumina beads                       | No            | -            | 21.7 mg / g | Yes<br>8.87 mg/g | [27]      |
| 11 | Carbon decorated with MnO <sub>2</sub> nanocomposites      | No            | –            | 88.5 mg / g | –                | [29]      |
| 12 | Functionalized Dendritic Nano Silica                       | Yes/ Turn-on  | 4.9 nM       | 97.8 mg / g | Yes              | This Work |

**Table S6.** The mortality percentage of *Artemia salina* with MDNS@DAAH with respect to time

| S.No | Experiment                  | 0 hr | 6 hr | 12 hr | 24 hr |
|------|-----------------------------|------|------|-------|-------|
| 1.   | Control Experiment          | 0    | 0    | 0     | 3     |
| 2.   | MDNS@DAAH                   | 0    | 0    | 3     | 5     |
| 3.   | Li <sup>+</sup>             | 0    | 3    | 5     | 10    |
| 4.   | MDNS@DAAH + Li <sup>+</sup> | 0    | 4    | 7     | 14    |

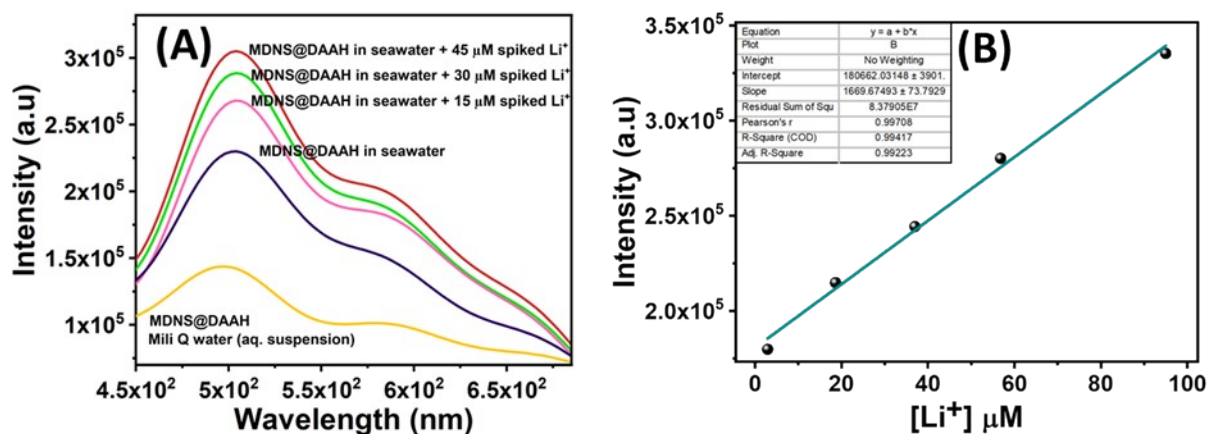

**Fig. S20** (A) Fluorescence emission of material with seawater and spiked samples and (B) The calibration plot of material with  $\text{Li}^+$  from fluorescence titration experiment.

**Table S7.** Quantification of  $\text{Li}^+$  ions probe materials in seawater sample.

| Analyte       | Proposed ( $\mu\text{M}$ ) | Spiked ( $\mu\text{M}$ ) | found | Recovery % | RSD  | N=2 |
|---------------|----------------------------|--------------------------|-------|------------|------|-----|
| $\text{Li}^+$ | 28.81                      | 15 $\mu\text{M}$         | 45.21 | 106.23 %   | 2.87 | 2   |
|               |                            | 30 $\mu\text{M}$         | 59.93 | 101.90 %   | 1.45 | 2   |
|               |                            | 45 $\mu\text{M}$         | 75.38 | 102.13 %   | 1.03 | 2   |

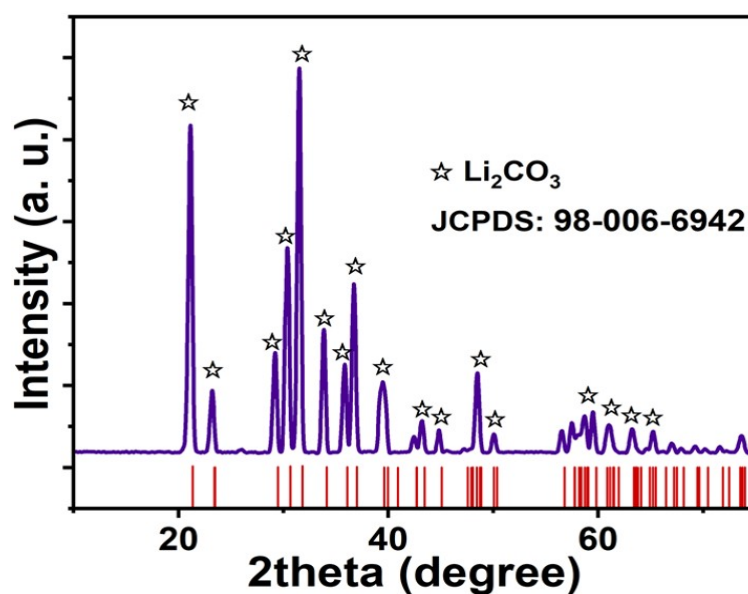

**Fig. S21** The PXRD profile of the precipitated  $\text{Li}_2\text{CO}_3$  from sea bittern.

## References:

1. Spartan Wavefunction, Inc. Irvine, CA 92612 2013.
2. A. D. Becke, *J. Chem. Phys.* **1993**, *98*, 5648.
3. S. Grimme, J. Antony, S. Ehrlich, H. Krieg, *J. Chem. Phys.* **2010**, *132*, 154104.
4. F. Weigend, R. Ahlrichs, *Phys. Chem. Chem. Phys.* **2005**, *7*, 3297.
5. Frisch, M. J.; Trucks, G. W.; Schlegel, H. B.; Scuseria, G. E.; Robb, M. A.; Cheeseman, J. R.; Scalmani, G.; Barone, V.; Petersson, G. A.; Nakatsuji, H.; Li, X.; Caricato, M.; Marenich, A.; Bloino, J.; Janesko, B. G.; Gomperts, R.; Mennucci, B.; Hratchian, H. P.; Ortiz, J. V.; Izmaylov, A. F.; Sonnenberg, J. L.; Williams-Young, D.; Ding, F.; Lipparini, F.; Egidi, F.; Goings, J.; Peng, B.; Petrone, A.; Henderson, T.; Ranasinghe, D.; Zakrzewski, V. G.; J. Gao, N. R.; Zheng, G.; Liang, W.; Hada, M.; Ehara, M.; Toyota, K.; Fukuda, R.; Hasegawa, J.; Ishida, M.; Nakajima, T.; Honda, Y.; Kitao, O.; Nakai, H.; Vreven, T.; Throssell, K.; Montgomery, J. A. J.; Peralta, J. E.; Ogliaro, F.; Bearpark, M.; Heyd, J. J.; Brothers, E.; Kudin, K. N.; Staroverov, V. N.; Keith, T.; Kobayashi, R.; Normand, J.; Raghavachari, K.; Rendell, A.; Burant, J. C.; Iyengar, S. S.; Tomasi, J.; Cossi, M.; Millam, J. M.; Klene, M.; Adamo, C.; Cammi, R.; Ochterski, J. W.; Martin, R. L.; Morokuma, K.; Farkas, O.; Foresman, J. B.; Fox, D. J. Gaussian 09, Revision D.01. *Wallingford CT, 2013* **2013**.
6. A. V. Marenich, C. J. Cramer, D. G. Truhlar, *J. Phys. Chem. B* **2009**, *113*, 6378.
